# Supplementary material for: Flavonoids from Seabuckthorn (Hippophae rhamnoides L.) restore CUMS-induced depressive disorder and regulate the gut microbiota in mice
Source: Royal Society of Chemistry journal article supplement (doi:10.1039/d3fo01332d), 2023-01-01
Supplement: d3fo01332d1.xlsx [file d3fo01332d1.xlsx]

## Sheet: Fig.1 behavior tests
body weight	Control	39.1	43.8	39.7	36.1	41.3	40	42.3	36.4	39.9	39.2
	CUMS	29.8	28.8	32.6	27.6	27.8	29.3	30.1	28.8	29.4	26.9
	Fluoxetine	40.4	42.4	42.4	41.7	39.8	36.9	40.3	41.5	39.6	38.9
	SBF-L	37.1	41.7	40.9	39.3	38.9	38.4	41.8	42.7	41.8	40.8
	SBF-H	40.8	38.8	38.9	37.3	39,2	40.6	36.3	39.3	38.3	38.9
sucrose preference	Control	67	100	88	80	78	87	69	75	68	81
	CUMS	61	33	67	59	52	14	59	57	50	47
	Fluoxetine	67	69	65	70	64	68	57	58	56	63
	SBF-L	62	63	78	59	61	67	69	55	59	66
	SBF-H	64	57	62	61	60	54	56	63	53	57
forced swimming	Control	76.4	42.16	65.16	70.64	62.7	65.49	53.26	67.16	60.8	62.8
	CUMS	151.22	146.18	172.26	137.2	148.53	141.22	128.56	160.16	130.98	147.23
	Fluoxetine	55.88	62.82	61.28	49.3	65.12	70.52	80.1	65.02	69.84	62.99
	SBF-L	85.57	47.22	72.98	79.12	68.42	73.35	59.65	75.22	68.1	70.78
	SBF-H	92.44	51.01	78.84	85.47	74.89	79.24	64.44	81.26	73.57	75.78
tail suspesion	Control	35	90.24	116	98.53	67.98	56	43.87	73.54	31.95	70.23
	CUMS	162.72	168.81	115.1	127.57	150.34	147.6	183	100.39	180.64	144.37
	Fluoxetine	106.15	26.85	101.97	94.41	70.45	112.26	120.81	99	47.65	105.43
	SBF-L	119.39	69.5	48.9	124.53	82.6	71.16	37.38	91.46	96.74	81.9
	SBF-H	69.48	53.29	121.24	140	95.45	56.23	60.57	100	85.4	77.98

## Sheet: Fig.3 neurotransmitters, NFs
cortex, NGF	Control	944.198	1045.77	736.109	679.306	905.252	1146.15	897.069	913.021		cortex, BDNF	Control	235.853	177.596	180.73	162.436	187.202	187.496	187.661	223.031		cortex, GDNF	Control	226.968	168.242	124.501	208.821	154.92	127.111	179.959	173.263
	CUMS	202.247	178.792	139.561	205.261	165.314	188.603	160.885	194.031			CUMS	45.6413	57.1908	53.3079	47.2522	52.6391	59.4386	48.2654	60.0311			CUMS	44.9796	26.2464	29.256	29.3065	28.5683	44.1886	32.0101	42.4262
	Fluoxetine	896.373	787.227	947.191	684.669	778.879	908.587	850.639	899.873			Fluoxetine	217.289	163.033	177.29	182.151	263.726	264.581	202.14	241.252			Fluoxetine	216.264	181.425	177.16	163.068	194.956	220.247	167.822	191.753
	SBF-L	271.525	329.291	332.871	351.819	302.223	342.887	246.131	323.003			SBF-L	102.964	74.9537	119.511	88.4246	76.3878	89.7375	79.3972	92.242			SBF-L	108.596	99.6264	121.851	124.489	102.682	102.274	107.067	123.469
	SBF-H	413.674	551.127	380.42	329.474	356.735	330.739	320.797	418.325			SBF-H	97.1838	128.59	110.412	107.245	124.031	121.304	92.0661	116.942			SBF-H	88.2692	69.4262	70.2745	62.5882	79.9796	71.6738	84.5702	83.1531
hippocampus, NGF	Control	9.81828	10.4252	8.91419	9.062	7.94753	9.36109	10.257	12.0123		hippocampus, BDNF	Control	17.1519	17.1987	15.9395	15.242	17.8646	18.3142	15.8212	19.2462		hippocampus, GDNF	Control	5.11944	4.8512	5.1538	4.67564	4.63537	5.87963	6.00079	5.71351
	CUMS	5.52113	5.7207	6.64177	6.69522	6.02342	6.485	6.54078	6.53927			CUMS	1.74575	2.17999	1.61826	1.84252	2.40158	2.01906	2.33954	2.21131			CUMS	1.17138	0.95262	0.95098	0.943158	1.34967	1.1368	1.10984	1.73231
	Fluoxetine	8.1961	10.124	8.96765	6.85953	7.1482	10.3281	5.5875	9.59264			Fluoxetine	16.8315	14.872	11.2868	10.352	11.2021	14.6454	9.78613	15.9922			Fluoxetine	5.22927	4.94111	5.10051	6.71813	3.2767	4.61257	6.42595	5.5351
	SBF-L	9.36913	7.16851	7.27597	8.29083	6.8368	6.95923	7.12261	8.42628			SBF-L	8.8045	10.1592	10.9117	6.9235	6.82985	7.64587	6.72491	8.93152			SBF-L	1.98863	2.15272	2.17486	2.99243	2.84149	2.07798	1.95206	2.4633
	SBF-H	10.2582	10.5495	9.29753	8.04297	8.83628	7.60523	7.6007	9.01728			SBF-H	10.522	11.3235	8.69381	7.8315	8.03112	10.1148	8.93845	11.4252			SBF-H	3.66198	2.5411	3.43776	2.45334	2.90553	2.76793	2.62078	3.3572
cortex, DA	Control	331.806	374.502	324.798	376.51	302.233	256.838	345.884	368.934		cortex, NE	Control	0.172526	0.176082	0.195749	0.1542	0.184841	0.128086	0.146663	0.17422		cortex, 5-HT	Control	290.646	201.625	202.262	248.245	279.765	236.943	197.33	283.472
	CUMS	148.626	134.725	115.891	144.368	102.435	118.869	140.785	165.032			CUMS	0.020959	0.018588	0.026306	0.021113	0.030794	0.030162	0.025597	0.02642			CUMS	54.307	62.6422	71.8634	44.6412	96.379	73.6035	50.0737	68.3519
	Fluoxetine	212.347	289.663	221.781	347.546	205.262	348.23	257.757	353.426			Fluoxetine	0.152955	0.155946	0.124724	0.11425	0.141272	0.108622	0.09197	0.140253			Fluoxetine	122.109	169.461	203.922	202.516	112.374	237.144	172.912	182.002
	SBF-L	231.412	162.93	227.799	141.625	159.243	139.843	161.055	195.035			SBF-L	0.042762	0.03964	0.024381	0.0292524	0.038272	0.040328	0.039372	0.042532			SBF-L	143.306	96.4611	82.1853	160.357	136.552	107.302	85.1605	140.727
	SBF-H	150.227	228.538	243.853	283.078	210.362	163.424	252.823	230.426			SBF-H	0.082604	0.08908	0.070645	0.072353	0.075124	0.098529	0.052104	0.08463			SBF-H	154.049	118.352	127.45	149.624	131.186	150.617	120.898	157.352
hippocampus, DA	Control	21.138	21.4468	25.6451	24.7855	22.2634	24.3212	23.5897	26.0235		hippocampus, NE	Control	10.3451	11.1992	11.6632	8.73462	9.04896	7.86746	9.94118	11.3422		hippocampus, 5-HT	Control	9.44435	7.6511	8.843	8.03567	7.4	7.38258	8.27356	8.90246
	CUMS	4.02787	6.76235	5.33079	6.24889	3.92452	6.77743	5.29835	7.39685			CUMS	1.5874	2.2638	1.77361	1.453	1.76878	1.48217	1.54356	2.01425			CUMS	1.94145	1.91315	1.53064	1.46386	3.2392	2.13115	2.82918	2.30151
	Fluoxetine	16.1944	18.2788	17.8723	14.3142	15.3224	16.5191	13.5549	16.9333			Fluoxetine	18.0449	19.7246	12.9429	11.3524	12.2632	12.9961	15.0407	18.8436			Fluoxetine	5.48488	5.01425	8.18921	6.25372	8.69555	5.69404	6.17436	8.33572
	SBF-L	9.82188	6.47297	4.55019	8.83739	5.4262	6.79507	9.59991	9.90647			SBF-L	2.88244	2.55546	2.00953	2.1422	2.59672	3.8678	2.62024	3.3536			SBF-L	3.27725	2.6351	3.50959	4.2736	3.32053	3.53118	2.9023	4.30361
	SBF-H	7.10309	10.5909	6.39415	12.2444	5.4622	7.15502	16.1435	14.6246			SBF-H	6.10352	5.83272	5.792	6.8226	5.12703	8.00261	9.63778	6.6318			SBF-H	5.19935	3.7462	5.53546	5.67413	4.39286	4.17068	3.59458	5.68961

## Sheet: Fig.4 hormones, cytokines
cortex, IL-1β	Control	219.718	363.656	302.315	284.601	269.387	352.937	381.731	322.462		cortex, IL-6	Control	110.184	160.607	125.769	144.317	94.3926	125.162	153.869	138.045		cortex, TNF-α	Control	236.459	409.897	413.79	325.135	212.243	306.772	210.75	270.642
	CUMS	975.529	863.38	997.513	918.165	1029.98	880.526	1372.82	1015.41			CUMS	254.222	221.314	268.903	382.366	312.804	228.461	200.848	317.415			CUMS	553.581	378.297	456.689	482.526	376.274	426.959	428.812	390.415
	Fluoxetine	573.624	996.411	693.636	834.421	574.974	712.135	782.098	797.314			Fluoxetine	170.671	226.742	164.326	250.169	200.31	188.312	196.471	215.264			Fluoxetine	373.386	234.741	332.354	375.624	328.932	266.997	217.207	210.352
	SBF-L	1061.73	627.244	773.511	888.684	836.826	755.905	838.63	898.314			SBF-L	156.119	112.521	183.463	200.163	120.912	155.464	197.342	167.315			SBF-L	467.528	395.438	392.172	426.426	492.034	388.078	350.985	402.462
	SBF-H	337.564	234.678	297.431	310.652	284.954	336.308	311.626	308.051			SBF-H	167.276	166.006	226.559	154.276	113.465	136.426	140.56	186.461			SBF-H	365.002	280.541	333.055	349.426	370.913	285.346	314.445	300.426
hippocampus, IL-1β	Control	17.4728	32.0638	25.518	40.8926	24.6786	35.5607	21.8114	31.1635		hippocampus, IL-6	Control	2.58115	5.1838	5.51079	4.7248	3.95305	3.613	3.99775	5.031		hippocampus, TNF-α	Control	31.2729	20.3208	20.6126	24.6224	28.947	18.8154	17.4889	20.4262
	CUMS	79.1203	102.652	65.3411	98.3049	63.7656	67.7449	74.5782	97.3411			CUMS	6.18503	8.44924	7.78739	6.27732	7.71799	6.53159	7.42226	8.20319			CUMS	49.9385	48.3528	38.541	48.3153	46.3549	30.3481	39.2708	37.461
	Fluoxetine	46.3668	19.8551	22.4532	39.9558	60.687	37.2536	24.6258	55.1325			Fluoxetine	3.32809	4.93804	4.43374	2.78398	2.31639	2.84511	4.02555	4.53513			Fluoxetine	29.4268	43.5047	30.7001	38.0451	26.007	35.1316	25.6556	25.2624
	SBF-L	24.1397	14.2058	12.3511	15.352	17.4976	20.443	11.2652	22.4616			SBF-L	5.19225	4.05028	4.30194	3.81692	3.72959	2.7813	2.85645	4.73135			SBF-L	39.7671	38.6341	32.6189	42.4615	35.6601	41.1425	29.797	30.4614
	SBF-H	16.591	19.0218	12.1353	13.7052	13.2431	27.1809	11.2986	20.6161			SBF-H	4.15039	4.43648	4.2523	3.18534	3.49217	3.56262	3.84844	4.1322			SBF-H	33.7707	29.3126	22.7957	32.4641	22.9544	26.6887	25.2415	20.4246
small intestine, IL-1β	Control	84.8253	72.7126	43.6242	50.1421	32.9425	14.9869	13.4888	45.6622		small intestine, IL-6	Control	50.1421	32.9425	14.9869	12.3385	14.59	22.462	13.4888	23.9935		small intestine, TNF-α	Control	759.805	604.998	1065.17	916.62	800.799	809.714	1409.15	900.426		small instine, LPS	Control	50.2283	37.5084	53.0351	57.9293	44.0081	40.6466	45.8723	40.3151
	CUMS	102.9	160.273	101.414	118.986	95.2699	118.289	97.1508	129.151			CUMS	102.9	160.273	118.986	95.2699	118.289	126.002	97.1508	105.272			CUMS	5922.39	5777.18	3274.55	5530.42	6105.59	5797.41	5629.6	5300.46			CUMS	187.315	288.695	278.415	256.27	252.26	294.015	249.558	231.351
	Fluoxetine	31.2038	32.3521	29.4611	53.9258	15.5542	42.0108	29.4357	38.416			Fluoxetine	31.2038	32.3521	54.1753	53.9258	42.0108	30.622	29.4357	50.5361			Fluoxetine	3241.29	3961.64	3370.62	4023.43	4292.53	3145.77	3044.48	3002.43			Fluoxetine	91.5704	124.852	133.415	74.911	176.833	178.857	62.1179	103.425
	SBF-L	61.3263	63.6804	66.3161	86.4458	68.5654	94.6667	57.2337	76.2471			SBF-L	61.3263	63.6804	86.4458	66.6256	57.2337	59.621	57.7412	71.4261			SBF-L	3563.63	4904.12	6041.62	4494.46	3020.73	4008.26	3436.63	3831.45			SBF-L	47.7331	52.7237	67.3531	56.9319	45.9374	75.796	80.2325	51.4521
	SBF-H	56.562	111.225	65.1617	54.7938	71.2275	85.3015	51.1792	77.3161			SBF-H	108.712	56.562	54.7938	71.2275	85.3015	60.1515	51.1792	82.4161			SBF-H	4959.07	3419.44	4488.23	4290.42	3073.86	3718.14	3045.68	3284.32			SBF-H	59	123.126	130.352	134.164	112.884	119.551	106.396	89.42
serum, IL-1β	Control	65.8825	55.7175	50.3171	41.4075	74.045	57.755	69.9475	70.4442		serum, IL-6	Control	466.87	260.955	551.205	402.385	281.42	400.425	474.33	413.426		serum, TNF-α	Control	3296	2743.63	2982.03	3821.33	3187.99	3013.54	2170.16	2074.3		serum, LPS	Control	38.025	36.84	43.4246	39.955	41.1575	37.1975	34.825	32.3515
	CUMS	101.123	165.875	128.362	171.835	172.868	63.93	166.113	152.422			CUMS	1534.75	620.275	867.83	723.615	707.53	804.246	573.885	870.241			CUMS	4916.35	8889.26	4151.33	6428.49	6212.1	7045.94	6086.4	5991.35			CUMS	236.282	254.683	258.051	209.232	252.125	245.525	244.333	223.245
	Fluoxetine	53.695	41.455	63.0031	65.88	57.76	39.405	49.6225	40.3131			Fluoxetine	373.605	408.5	254.16	549.18	446.83	350.415	348.97	442.279			Fluoxetine	3970.39	4435.54	4643.61	4508.35	4204.16	5887.6	2765.02	4132.45			Fluoxetine	39.01	38.44	46.4511	37.25	39.8675	42.035	40.215	32.3515
	SBF-L	116.965	60.1	55.4221	66.6125	86.865	75.2765	42.7809	93.616			SBF-L	804.315	1059.03	598.24	570.735	750.625	800.242	1047	809.461			SBF-L	4584.98	2923.5	4157.07	3720.15	2154.12	2730.14	3338.37	2915.43			SBF-L	156.308	179.04	159.52	151.565	123.388	120.728	119.877	121.462
	SBF-H	113.51	43.72	74.3151	109.79	66.835	76.525	82.376	90.4264			SBF-H	399.09	511.375	206.89	548.88	592.03	370.194	187.995	444.422			SBF-H	4158.98	3488.23	2733.9	3897.43	5169.1	2513.83	3045.68	3124.35			SBF-H	69.2125	83.925	75.3513	81.52	74.4	68.34	42.0225	60.3151
serum, ACTH	Control	38.025	36.84	33.411	39.955	41.1575	37.1975	34.825	42.5724		serum, CRF	Control	598.383	468.275	591.875	527.975	485.848	500.351	482.688	551.315		serum, cortisol	Control	126.412	138.843	152.995	151.542	119.365	144.067	150.048	125.424
	CUMS	236.282	254.683	210.343	209.232	252.125	245.525	244.333	270.416			CUMS	1242.11	1157.29	1211.05	1050.42	1214.39	1088.32	1199.48	1270.25			CUMS	713.842	616.117	611.612	705.462	667.32	749.817	708.535	650.423
	Fluoxetine	39.01	38.44	36.4111	37.25	39.8675	42.035	40.215	42.4212			Fluoxetine	660.585	650.12	647.725	669.24	655.362	640.451	634.725	665.314			Fluoxetine	151.41	154.137	164.938	175.331	155.502	167.19	165.07	145.642
	SBF-L	156.308	179.04	125.242	151.565	123.388	120.728	119.877	158.242			SBF-L	1003.33	1055.84	871.655	1026.31	1063.52	900.41	918.242	1082.32			SBF-L	565.5	613.872	551.342	659.135	579.67	538.635	627.847	500.452
	SBF-H	69.2125	83.925	58.351	81.52	74.4	68.34	42.0225	80.1515			SBF-H	785.725	731.17	680.83	777.79	709.285	680.245	668.895	770.352			SBF-H	516.643	444.595	533.107	535.246	507.955	471.798	481.255	450.246

## Sheet: Fig.5A  otu.r_sobs
num sample rows	SBF-H_6	CUMS_6	CUMS_4	FXT_3	CON_4	SBF-H_3	SBF-H_4	CON_6	FXT_1	FXT_4	CON_5	CUMS_3	FXT_5	CON_3	FXT_2	SBF-H_1	CUMS_2	CON_1	SBF-H_2	FXT_6	CUMS_1	CON_2	CUMS_5	SBF-H_5
1	1	1	1	1	1	1	1	1	1	1	1	1	1	1	1	1	1	1	1	1	1	1	1	1
800	98.83	86.02	109.07	109.68	157.1	170.41	103.36	166.24	100.73	99.2	128.75	90.92	79.92	145.97	133.29	166.17	93.57	113.02	172.2	107.27	90.76	128.12	115.07	97.29
1600	139.4	124.76	158.65	152.75	213.76	236	144.22	232.47	136.43	136.86	174.33	130.14	113.17	207.77	184.61	239.15	130.54	158.34	240.46	147	131.15	181.61	166.18	134.03
2400	169	153.14	192.81	182.86	251.26	279.96	172.04	278.37	161.31	165.34	204.02	157.45	136.03	252.37	219.26	292.16	156.92	191.24	286.29	173.57	159.96	222.57	202.79	159.09
3200	192.91	176.75	220.8	207.37	280.46	314.55	193.08	314.82	180.72	187.52	227.77	179	154.47	288.22	247.06	335.05	178.28	217.94	322.05	193.89	185.15	254.75	230.61	178.91
4000	213.24	197.43	244.84	226.93	304.66	343.12	210.77	343.71	197.53	206.22	247.56	196.98	169.77	319.69	270.86	371.49	196.87	240.26	352.69	211.5	205.32	282.97	254.09	195.42
4800	230.6	215.99	265.18	243.83	323.93	367.54	226.31	369	212.08	222.9	265.08	212.42	182.74	344.83	290.59	402.69	212.59	260.47	379.01	226.31	222.84	306.27	275.89	209.32
5600	245.89	233.28	283.2	259.45	340.68	389.19	239.29	391.6	224.41	237.34	279.98	225.93	194.37	368.01	308.82	429.01	227.27	278.22	402.4	239.58	238.53	327.92	294.36	221.58
6400	259.44	249.19	300.06	271.98	356.09	408.51	251.22	412.18	235.73	250.3	293.24	238.33	204.94	388.23	325.18	454.59	240.56	294.21	423.35	251.32	252.2	347.36	311.27	232.16
7200	272.24	262.99	315.16	284.12	369.54	426.45	261.91	430.69	246.41	261.72	305.81	250.02	214.69	407.99	339.7	476.87	252.94	308.76	442.39	262.54	265.26	365.61	326.17	241.69
8000	283.19	275.96	328.13	295.61	382.5	442.72	272.33	447.97	255.51	272.9	316.23	260.56	223.48	425.97	353.23	497.64	264.03	322.24	460.27	272.08	277.85	382.65	340.24	250.56
8800	294.48	288.64	340.97	306.36	394.54	458	282.04	464.04	264.1	282.76	326.28	270.54	231.88	441.77	365.07	517.69	274.52	334.6	476.4	280.92	289.33	397.79	352.52	259.04
9600	304.1	300.48	352.02	315.77	405.39	471.99	291.05	479.29	272.72	292.18	335.72	279.99	239.25	456.26	376.71	536.04	284.23	346.67	491.26	288.89	299.72	412.22	364.93	266.6
10400	313.25	311.67	362.29	324.6	415.32	485.32	299.65	493.03	279.82	300.82	344.63	288.95	246.01	470.52	387.46	553.2	293.5	358.03	505.25	296.6	310	426.35	375.89	273.61
11200	321.88	321.63	371.96	333.37	425.24	498.25	307.83	505.77	287.08	309.51	352.93	297.08	252.69	483.82	398.3	569.22	301.97	368.3	519.08	304.38	319.3	438.88	386.5	280.42
12000	330.7	331.06	381.13	341.58	434.56	510.31	315.72	517.79	294.01	316.86	360.57	304.5	258.9	496.73	407.74	583.93	310.23	377.8	531.65	311.04	328.51	451.66	396.63	286.23
12800	338.97	340.57	389.32	349.45	443.16	521.23	322.53	529.24	300.46	324.72	368.31	312.21	264.72	508.96	417	597.84	318.14	387.11	543.63	317.8	336.98	463.07	406.33	293.02
13600	346.49	349.51	397.66	357	451.59	531.84	329.4	540.58	306.48	331.94	375.3	319.51	270.36	520.7	425.9	611.51	325.82	395.98	554.89	324.47	344.72	474.05	415.41	298.85
14400	353.37	358.07	405.55	363.86	459.27	542.11	335.5	551.43	312.43	338.33	382.22	325.97	275.71	531.69	434.45	624.75	332.77	404.08	565.94	330.47	353.12	484.76	424.59	303.99
15200	360.39	365.78	413.17	370.14	466.98	551.6	341.64	562.15	317.96	344.86	388.47	332.67	281.05	542.36	442.49	636.95	340.28	412.35	576.34	336.7	359.86	495.04	433.57	309.27
16000	366.65	373.75	420.03	376.81	473.99	560.78	347.56	572.3	323.37	350.91	394.91	338.04	285.85	552.44	450.23	648.53	346.68	420.64	586.14	342.02	367.72	504.97	441.84	314.38
16800	373.04	381.2	427.07	382.97	481.24	569.17	353.62	582.56	328.52	357.27	400.98	344.04	290.48	562.23	458.18	660.08	353.01	428.09	595.9	347.11	374.83	514.07	449.77	319.46
17600	379.17	388.48	433.91	389.18	487.73	577.73	359.36	592.16	333.59	362.94	406.71	349.62	295.26	571.63	465.75	671.07	359.12	435.3	605.26	352.06	381.41	522.98	457.55	324.13
18400	385.33	395.05	440.49	395.13	494.59	585.63	365.03	601.26	338.12	368.25	411.9	355.6	299.68	580.61	472.56	681.06	365.04	442.22	613.78	357.37	388.09	531.8	464.53	328.39
19200	390.82	401.86	446.88	400.75	501.13	593.36	370.37	610.21	342.71	373.55	416.74	361.27	304.06	589.16	478.96	691.26	370.74	448.86	622.76	361.86	394.69	540.26	471.34	332.64
20000	396.23	408.41	452.92	406.07	507.17	600.85	375.37	619.2	347.1	379.2	421.56	366.6	308.53	597.36	485.67	700.96	376.4	454.78	630.91	366.52	401.3	548.67	478.12	337.04
20800	401.92	415	458.52	410.87	513.3	608.04	380.01	627.36	351.28	384.31	426.08	371.61	312.57	604.85	492	709.9	381.4	461.14	639.18	371.12	407.2	556.24	485.04	341
21600	407.15	421.23	464.51	415.57	519.25	615.36	385.1	634.78	355.38	389.31	430.69	376.96	316.21	612.38	497.6	718.82	386.76	467.45	647.31	375.3	413.4	563.69	491.11	344.97
22400	412.11	426.88	469.71	420.9	525.09	622.43	389.76	641.8	359.55	394.05	435.24	381.79	320.36	620.18	503.6	727.58	391.58	473.27	654.89	379.42	419.06	571.01	497.15	348.84
23200	416.68	432.77	475.06	425.63	530.68	629.22	394.03	649.01	363.49	399	439.34	386.43	323.89	627.53	509.09	735.77	396.23	479.37	662.03	383.61	425.14	578.06	503.29	352.23
24000	421.46	438.34	480.38	430.32	536.21	635.83	398.66	656.22	367.1	403.86	443.91	391.01	327.58	634.4	514.59	744.34	401.4	485.11	668.57	387.71	430.51	584.92	509.22	355.64
24800	426.11	443.96	485.34	435.34	541.29	642.16	402.95	662.86	370.75	408.36	448.1	394.85	331.15	641.09	519.77	752.58	406.35	491.26	675.46	392.03	435.66	591.52	514.95	359
25600	430.4	449.32	489.95	439.54	546.48	648.5	407.01	669.33	374.18	412.69	452.28	398.89	334.7	647.22	525	760.07	410.41	496.61	681.55	395.95	440.88	598.21	520.59	362.7
26400	434.64	454.56	494.38	443.78	551.65	654.47	411.36	675.8	377.98	417.09	456.16	402.99	337.99	653.68	530.24	767.76	414.64	501.65	687.7	399.79	445.83	604.73	526.03	365.75
27200	438.35	459.7	498.99	448.1	556.67	660.34	415.41	681.79	381.2	421.58	459.81	406.66	341.45	660.34	535.63	775.4	419.32	506.89	693.97	403.51	450.86	610.74	531.2	368.72
28000	442.11	464.51	503.68	452.17	561.39	666.64	419.5	687.48	384.57	425.75	463.22	410.65	344.63	666.42	540.87	782.7	423.19	512.14	699.85	407.13	455.51	617.08	536.42	371.79
28800	446.13	469.62	507.61	456.21	566.11	672.5	423.67	693.53	387.72	429.91	467.13	414.91	347.63	672.12	545.74	789.6	427.18	517.01	706.08	410.47	460.27	623.11	541.37	374.68
29600	449.98	474.48	511.69	460.03	570.93	678.29	427	699.81	390.91	433.95	470.52	418.76	350.38	678.15	550.64	796.13	430.9	521.64	712.05	413.94	465.12	628.93	546.3	377.39
30400	453.64	479.21	515.8	463.77	575.35	683.75	430.8	705.51	393.94	438.05	473.83	422.22	353.79	683.81	554.81	802.72	434.55	526.23	717.73	417.22	469.66	634.77	551.02	380.26
31200	457.11	483.8	519.4	467.67	580.07	689.19	434.23	710.76	396.91	441.89	477.2	425.84	357	689	559.18	809.24	438.18	530.89	723.46	420.29	474.17	640.38	555.72	383.14
32000	460.74	488.33	522.98	471.34	584.41	694.45	437.77	716.02	399.57	445.65	480.92	429.42	359.96	694.32	563.34	815.46	441.96	535.21	728.76	423.81	478.47	645.82	560.67	385.69
32800	464.35	492.52	526.71	475.08	588.81	699.53	441.26	720.84	402.26	448.97	484.48	432.86	362.78	699.72	567.4	821.09	445.85	539.48	734.23	426.97	482.7	651.04	565.34	388.51
33600	467.57	497.09	530.47	478.93	593.35	704.97	444.48	725.99	404.87	452.57	487.37	436.19	365.53	704.83	571.44	827.19	449.51	543.63	739.24	429.98	486.97	655.94	569.7	391.08
34400	471.37	501.36	534.2	482.55	597.11	709.82	447.78	731.06	407.54	455.84	490.38	439.28	368.47	709.83	575.37	833.26	452.82	547.73	744.47	432.91	491.06	661.08	573.97	393.85
35200	474.91	505.58	537.98	485.7	601.23	714.57	451.11	736.02	409.83	459.21	493.23	442.69	371.29	714.81	579.53	839.26	455.87	551.81	749.57	435.97	495.14	666.19	577.82	396.49
36000	478.59	509.85	541.44	488.91	605.06	719.36	454.29	740.7	412.35	462.66	496	445.91	373.84	719.85	583.26	844.66	459.02	555.81	754.48	438.98	499.11	671.1	582.07	399.09
36800	481.6	514.15	544.98	492.24	609.29	724.23	457.43	745.49	414.84	465.88	498.96	448.87	376.43	724.49	586.89	850.52	462.47	559.51	758.93	441.77	502.37	675.68	586.17	401.66
37600	484.87	518.05	548.59	495.38	613.11	728.77	460.47	750.02	417.43	468.89	501.84	452.12	378.92	729.11	590.49	855.92	465.72	563.18	763.94	444.72	506.42	680.25	589.99	404.12
38400	488.09	521.68	552.29	498.3	616.86	732.91	463.7	754.54	420.06	472.13	504.49	454.92	381.68	733.56	594.3	860.91	468.74	566.97	768.44	447.56	510.18	684.9	593.67	406.43
39200	490.89	525.41	556.08	501.42	620.4	737.27	466.61	758.61	422.34	475.25	507.38	458.05	384.33	738.05	597.94	866.2	471.74	570.51	772.94	450.38	513.63	689.38	597.24	408.78
40000	494.01	529.16	559.28	504.23	624.15	741.81	469.58	763.48	424.68	478.33	510.07	461.04	386.99	742.47	601.4	871.44	474.99	574.24	777.51	452.92	517.3	694.03	600.82	410.95
40800	497.17	532.75	562.34	507.32	627.91	746.08	472.37	768.08	427.3	481.63	513.06	464.1	389.7	746.66	604.87	876.57	477.88	577.77	781.89	455.6	520.68	698.73	604.79	413.1
41600	500.13	536.05	565.59	510.28	631.38	750.25	475.21	772.26	429.48	484.51	515.45	466.81	392.23	750.67	608.21	881.57	480.67	581.51	786.07	458.02	524.34	703.33	608.09	415.19
42400	503.12	539.58	568.84	513.31	634.89	754.28	477.88	776.4	431.62	487.41	517.95	469.48	394.69	754.67	611.63	886.31	483.48	584.88	790.26	460.54	527.65	707.69	611.76	417.36
43200	506.08	542.83	572	516.06	638.1	758.04	480.91	780.65	433.91	490.36	520.52	472.2	397.02	758.75	614.77	891.04	486.27	588.09	794.59	463.19	531.18	712.01	615.17	419.38
44000	508.77	546.21	575.15	518.92	641.32	761.98	483.77	784.42	435.79	493.13	523	475.01	399.31	762.57	617.81	895.65	489.28	591	798.6	465.82	534.52	716.16	618.47	421.36
44800	511.39	549.55	578.14	521.77	644.83	766.15	486.44	788.63	438.17	495.86	525.52	477.91	401.69	766.4	620.93	900.43	491.92	594.16	802.61	468.22	537.88	720.23	622.13	423.29
45600	513.98	552.7	580.85	524.31	648.13	770.07	489.05	792.37	440.17	498.5	527.85	480.58	403.93	770.16	623.9	904.8	494.38	597.5	806.75	470.65	541.15	724.18	625.26	425.29
46400	516.57	555.82	583.75	527.11	651.33	773.94	491.51	796.17	442.37	501.24	530.3	483.28	406.2	773.91	626.81	909.27	497.06	600.96	810.83	473.06	544.34	727.8	628.57	427.33
47200	519.04	559.05	586.57	529.94	654.29	777.87	494.32	800.04	444.46	504.12	532.46	485.88	408.53	777.55	629.61	913.58	499.79	604.15	814.66	475.38	547.69	731.72	631.96	429.2
48000	521.65	561.88	589.32	532.63	657.63	781.26	496.96	803.24	446.57	506.75	535.07	488.47	410.73	781.12	632.24	918	502.44	606.98	817.99	477.67	550.68	735.42	635.19	431.03
48800	523.96	565.08	592.17	535.3	660.78	784.58	499.24	806.74	448.59	509.12	537.36	490.71	412.55	784.97	635.18	922.39	504.76	610.36	821.29	479.94	553.62	739.36	638.27	432.86
49600	526.38	568.11	594.87	537.88	663.78	787.93	502.03	810.49	450.52	511.74	539.57	492.79	414.7	788.42	637.88	926.75	507.17	613.22	824.76	482.26	556.71	743.1	641.04	434.57
50400	528.85	571.19	597.44	540.24	666.87	791.49	504.33	814.21	452.26	513.84	541.81	495.06	416.67	792.01	640.78	931.11	509.63	616.15	828.33	484.52	559.72	746.46	644.13	436.59
51200	531.29	573.97	600.33	542.96	669.84	794.85	506.58	817.54	454.23	516.04	544	497.66	418.49	795.19	643.44	935.37	511.75	618.6	831.82	486.7	562.28	749.83	646.91	438.38
52000	533.66	577.21	603.15	545.41	672.89	798.2	509.28	820.91	456.09	518.34	545.81	499.88	420.6	798.11	646.06	939.03	514.11	621.17	835.3	488.87	565.3	753.06	649.66	440.2
52800	535.97	580.23	605.56	547.88	675.92	801.45	511.78	824.39	457.84	520.57	548.14	502.34	422.92	801.22	648.9	942.96	516.31	624.02	839.11	490.66	568.35	756.53	652.3	442.03
53600	538.12	583.13	607.82	550.18	679.02	804.79	514.19	827.83	460.01	522.72	550.02	504.48	424.95	804.64	651.35	946.84	518.76	626.89	842.46	492.94	571.33	759.79	654.99	443.99
54400	540.38	586.22	610.31	552.58	681.89	807.81	516.28	831.06	461.75	524.77	552.05	506.98	426.94	807.96	653.93	950.59	521.03	629.41	845.65	495.09	574	763.27	657.96	445.71
55200	542.48	589.03	612.65	555.09	684.62	811.19	518.68	834.47	463.63	527.2	554.02	509.2	428.89	810.95	656.41	954.46	523.31	631.82	848.63	497.3	576.83	766.61	660.63	447.35
56000	544.52	591.77	615.01	557.28	687.43	814.47	520.7	837.8	465.49	529.4	556.03	511.21	430.84	814.27	659.25	958.19	525.25	634.59	851.74	499.08	579.3	769.84	663.45	448.91
56800	546.59	594.28	617.49	559.42	690.22	817.13	523.21	840.96	467.23	531.84	558.12	513.68	432.55	817.19	661.38	961.97	527.49	637.23	854.91	501.17	581.93	773.04	665.85	450.73
57600	548.84	596.91	619.91	561.55	693.29	820.22	525.15	843.95	468.96	534.16	560.01	515.86	434.37	820.06	663.96	965.48	529.63	640.1	857.91	503.1	584.53	776.16	668.37	452.49
58400	551.05	599.43	622.35	563.82	696.15	823.54	527.45	846.72	470.85	536.26	561.91	518	436.24	822.76	666.5	968.58	531.47	642.58	860.84	504.84	587.38	779.11	670.93	454.01
59200	553.2	601.76	624.63	565.94	698.9	826.76	529.64	849.55	472.51	538.42	563.77	520.16	437.9	825.42	668.97	971.8	533.67	644.98	863.83	506.57	589.99	781.92	673.48	455.68
60000	554.91	604.12	626.98	567.9	701.56	829.76	531.86	852.53	474.03	540.62	565.43	522.37	439.99	828.37	671.31	975.3	535.77	647.15	866.84	508.62	592.44	785.1	676.3	457.46
60800	556.9	606.61	629.27	569.92	704.31	832.71	533.83	855.51	475.66	542.53	567.33	524.2	441.9	830.96	673.74	978.89	537.93	649.91	870.14	510.5	595.01	788.26	678.64	459.31
61600	559.03	609.08	631.39	571.9	706.97	835.57	535.78	858.58	477.23	544.6	569.24	525.85	443.67	833.66	676.31	981.81	539.96	652.28	873	512.19	597.25	790.99	681.09	460.84
62400	560.91	611.29	633.75	573.9	709.35	838.05	537.74	861.46	479.02	546.51	571.03	527.84	445.41	836.19	678.5	985.14	541.99	654.79	875.84	513.74	599.53	793.95	683.24	462.44
63200	562.79	613.85	636.23	575.93	711.71	840.81	539.75	864.27	480.59	548.48	572.94	529.84	447.27	838.85	681.1	988.43	544.17	657	878.54	515.52	602.39	796.85	685.35	464.16
64000	564.54	616.36	638.42	577.99	714.14	843.19	541.67	866.96	482.1	550.38	574.57	531.78	448.99	841.34	683.38	991.76	546.4	659.38	881.12	517.14	604.58	799.48	687.7	465.41
64800	566.4	618.78	640.4	580.03	716.42	845.87	543.86	869.61	483.54	552.24	576.38	533.84	450.75	844	685.68	994.72	548.59	661.85	883.54	518.83	606.68	802.29	689.99	467.15
65600	568.2	621.11	642.39	582.27	718.82	848.61	546.02	872.24	484.95	554.2	578.28	535.73	452.4	846.66	688.01	997.78	550.39	663.99	885.96	520.49	609	805.03	692.26	468.67
66400	569.94	623.53	644.38	584.13	721.56	851.35	547.88	874.81	486.36	556.03	580	537.54	454.2	849.24	690.06	1000.95	552.4	666.05	888.53	522.11	611.22	807.63	694.34	470.05
67200	571.79	625.81	646.2	586.08	723.99	853.89	549.69	877.25	488.09	558.08	581.84	539.32	455.74	851.85	692.13	1004.15	554.33	668.56	891.28	523.7	613.7	810.55	696.88	471.64
68000	573.6	628.26	647.98	588.03	726.42	856.47	551.63	880.04	489.65	559.94	583.8	541.07	457.41	854.35	694.34	1007.14	556.23	670.88	893.78	525.42	616.04	813.07	699.07	472.83
68800	575.3	630.51	649.96	589.89	728.68	858.96	553.53	882.8	490.86	561.9	585.27	543.09	459.52	856.92	696.57	1009.82	558.36	672.97	896.44	526.97	618.51	815.33	701.13	474.19
69600	577.14	632.83	651.83	591.59	730.88	861.42	555.52	885.44	492.3	563.7	586.87	544.64	461.18	859.18	698.53	1012.63	560.15	675.28	898.92	528.48	620.87	817.95	703.46	475.81
70400	578.89	635.16	653.66	593.39	733.14	864.03	557.33	887.9	493.82	565.62	588.37	546.34	462.72	861.12	700.33	1015.62	561.96	677.38	901.25	530.15	622.99	820.66	705.56	477.27
71200	580.68	637.4	655.6	595.26	735.58	866.51	559.21	890.46	495.22	567.36	589.97	547.94	464.33	863.43	702.61	1018.27	563.75	679.54	903.84	531.86	624.98	823.1	707.27	478.44
72000	582.34	639.63	657.46	597.15	737.83	868.83	560.87	892.72	496.8	569.04	591.73	549.38	465.76	865.58	704.89	1020.79	565.38	681.57	906.19	533.58	627.09	825.52	709.25	479.81
72800	584	641.59	659.2	598.88	740.05	871.34	562.93	895.38	498.25	570.82	593.27	551.14	467.49	867.91	706.81	1023.37	567.15	683.66	908.68	535.09	629.13	828.2	711.26	481.27
73600	585.72	643.91	661.18	600.95	742.35	873.61	564.85	897.69	499.7	572.72	594.81	552.83	469.18	870.05	708.6	1026.3	568.76	685.59	911.22	536.61	631.36	830.44	713.24	482.47
74400	587.34	646.05	663.28	602.73	744.63	876.07	566.66	899.98	501.13	574.47	596.29	554.31	470.68	872.05	710.59	1028.94	570.56	687.26	913.49	538.3	633.68	832.88	715.24	483.61
75200	589.07	648.12	665.16	604.51	746.7	878.25	568.33	902.48	502.63	576.18	597.77	556	472.27	874.25	712.38	1031.82	572.3	689.41	915.56	539.67	635.64	835.21	717.33	484.99
76000	590.64	650.06	666.83	606.24	749.05	880.42	570.01	904.78	503.78	577.72	599.39	557.61	473.87	876.07	714.14	1034.48	573.93	691.36	917.95	541.12	637.71	837.36	719.23	486.28
76800	592.19	652.28	668.74	608.08	751.3	882.49	571.76	907.02	505.08	579.27	600.96	558.97	475.18	877.99	716.06	1037.11	575.71	693.3	920.24	542.63	639.86	839.39	721.24	487.64
77600	593.63	654.06	670.47	609.89	753.34	884.72	573.56	909.55	506.38	581.01	602.28	560.51	476.52	879.76	717.8	1039.5	577.66	695.21	922.32	544.13	641.66	841.56	723.33	488.89
78400	595.01	656.16	672.3	611.59	755.63	887.07	575.15	911.81	507.82	582.65	603.62	562.25	478.08	881.98	719.79	1042.1	579.42	697.14	924.58	545.28	643.62	843.77	725.31	489.98
79200	596.33	658.04	674.01	613.22	757.91	889.06	576.68	914.06	509.07	584.21	605.07	563.69	479.6	883.92	721.6	1044.51	581.31	699.01	926.64	546.87	645.58	845.95	727.01	491.34
80000	598.03	659.97	675.53	614.84	760.12	891.33	578.56	916.28	510.64	585.91	606.47	565.23	481.02	886.1	723.37	1047.04	582.83	700.93	929.01	548.25	647.7	848.3	728.76	492.5
80800	599.51	661.95	677.18	616.6	762.38	893.36	580.21	918.36	512.07	587.55	607.78	566.75	482.23	888	725.29	1049.54	584.55	702.88	931.07	549.59	649.46	850.49	730.35	493.8
81600	601	663.91	679.04	618.4	764.41	895.38	581.76	920.46	513.51	589.01	609.32	568.17	483.52	889.94	727.25	1051.98	586.21	705.08	933.16	550.91	651.15	852.5	732.13	494.96
82400	602.31	666	680.74	620.17	766.39	897.33	583.28	922.45	514.79	590.39	610.79	569.56	484.91	891.8	728.99	1054.3	588.05	706.84	935.56	552.47	652.92	854.61	734.04	496.28
83200	603.81	667.71	682.82	621.78	768.55	899.47	584.91	924.58	516	591.87	612	571.02	486.21	893.66	730.76	1056.49	589.84	708.66	937.55	553.99	654.73	856.69	735.91	497.27
83757	605	669	684	623	770	901	586	926	517	593	613	572	487	895	732	1058	591	710	939	555	656	858	737	498

## Sheet: Fig.5A otu.r_shannon
num sample rows	CON_6	CUMS_4	SBF-H_3	CON_1	FXT_1	CON_2	CON_5	CUMS_1	FXT_6	SBF-H_5	CON_3	SBF-H_1	CUMS_6	CUMS_5	FXT_5	SBF-H_4	FXT_2	FXT_4	SBF-H_2	CON_4	SBF-H_6	CUMS_3	CUMS_2	FXT_3
1	0	0	0	0	0	0	0	0	0	0	0	0	0	0	0	0	0	0	0	0	0	0	0	0
800	4.0963	2.7169	4.1406	3.3103	3.3311	3.278	3.5213	2.6015	3.1298	2.9535	3.681	3.971	2.4634	3.0312	2.5242	3.253	3.7979	3.1995	4.1857	4.1703	3.0407	2.6331	2.9013	3.1927
1600	4.1999	2.7819	4.2398	3.3667	3.3865	3.352	3.592	2.6583	3.184	3.0085	3.7686	4.0678	2.5176	3.0948	2.5747	3.3089	3.8765	3.2512	4.286	4.2569	3.0891	2.6825	2.9541	3.2446
2400	4.2373	2.8064	4.2804	3.3951	3.41	3.3873	3.6197	2.6799	3.2042	3.0291	3.807	4.1091	2.5381	3.1248	2.6018	3.3296	3.9092	3.276	4.3261	4.2902	3.1168	2.7042	2.9789	3.2695
3200	4.2638	2.8209	4.305	3.4078	3.4232	3.4057	3.6345	2.69	3.2199	3.0432	3.8294	4.1335	2.5518	3.1387	2.615	3.3446	3.9255	3.2903	4.3452	4.3079	3.1324	2.7137	2.9921	3.2867
4000	4.2792	2.8324	4.3195	3.4168	3.4331	3.4167	3.6439	2.6985	3.2288	3.0498	3.8417	4.15	2.5626	3.1505	2.6218	3.3539	3.9362	3.2977	4.36	4.3184	3.1406	2.7211	3.0007	3.2964
4800	4.2908	2.8385	4.3285	3.4247	3.4395	3.4274	3.6533	2.705	3.2349	3.0558	3.854	4.1645	2.568	3.1564	2.6259	3.3602	3.9462	3.3037	4.3718	4.3267	3.1498	2.7276	3.0081	3.3029
5600	4.2982	2.8451	4.3375	3.43	3.4442	3.4319	3.6584	2.7104	3.2407	3.0594	3.8607	4.173	2.571	3.1606	2.6313	3.3661	3.9527	3.3118	4.38	4.3335	3.1559	2.7314	3.0125	3.3086
6400	4.3055	2.8489	4.3435	3.4346	3.4479	3.4375	3.6633	2.715	3.245	3.0633	3.8679	4.178	2.574	3.1662	2.6359	3.3715	3.9576	3.3159	4.3861	4.3398	3.1601	2.7328	3.0155	3.3127
7200	4.3115	2.8521	4.3496	3.4378	3.4502	3.4426	3.6678	2.7192	3.2486	3.0674	3.875	4.1836	2.5783	3.1712	2.639	3.3759	3.9611	3.3182	4.3914	4.3441	3.1622	2.7373	3.0191	3.3168
8000	4.3161	2.8561	4.3524	3.4401	3.4527	3.4467	3.6698	2.7211	3.2514	3.0695	3.88	4.1882	2.5817	3.1751	2.6399	3.3784	3.9643	3.3214	4.3964	4.3472	3.1652	2.7395	3.0212	3.3194
8800	4.3205	2.8593	4.3556	3.4432	3.4546	3.4489	3.672	2.725	3.2531	3.072	3.8844	4.1931	2.5838	3.178	2.6411	3.3822	3.9667	3.3237	4.4009	4.35	3.1683	2.7427	3.023	3.3227
9600	4.3236	2.8614	4.3594	3.4457	3.4562	3.4511	3.6741	2.7271	3.2561	3.0727	3.8871	4.1969	2.5848	3.1797	2.6421	3.385	3.9699	3.3251	4.4041	4.353	3.1708	2.7447	3.0245	3.3255
10400	4.3249	2.8646	4.362	3.4475	3.4581	3.4536	3.6767	2.7288	3.2583	3.0744	3.8892	4.201	2.5868	3.1824	2.6424	3.3869	3.9716	3.3268	4.4075	4.3543	3.1728	2.7466	3.0265	3.3271
11200	4.3267	2.866	4.3644	3.4497	3.4586	3.4564	3.6785	2.7305	3.2593	3.075	3.8922	4.2041	2.5888	3.1843	2.6436	3.3885	3.9734	3.3282	4.4106	4.3565	3.1748	2.7484	3.0276	3.3282
12000	4.3281	2.8672	4.3668	3.4511	3.4601	3.4572	3.6795	2.7321	3.2618	3.0768	3.8934	4.2062	2.5898	3.1861	2.6447	3.3902	3.9752	3.33	4.4133	4.3575	3.1756	2.7508	3.0279	3.3295
12800	4.3294	2.8683	4.3684	3.4518	3.4614	3.4583	3.6797	2.7328	3.263	3.0786	3.8948	4.2087	2.591	3.187	2.6456	3.3913	3.977	3.331	4.4159	4.3595	3.1764	2.752	3.0299	3.3317
13600	4.3308	2.8702	4.3704	3.454	3.4622	3.4593	3.6817	2.7343	3.2641	3.08	3.8962	4.2109	2.5921	3.1882	2.6464	3.393	3.9781	3.3321	4.4178	4.3607	3.1777	2.7528	3.0308	3.3333
14400	4.3322	2.8713	4.3714	3.4561	3.4638	3.4597	3.6826	2.7354	3.2652	3.0805	3.8979	4.2126	2.592	3.1896	2.6471	3.3944	3.9787	3.3324	4.419	4.3625	3.1786	2.7535	3.0315	3.3346
15200	4.334	2.8724	4.3729	3.4578	3.4648	3.461	3.6842	2.7362	3.2661	3.0807	3.8993	4.2141	2.5934	3.1909	2.6479	3.395	3.9797	3.3331	4.4207	4.3644	3.1796	2.755	3.0325	3.3355
16000	4.3357	2.8742	4.3742	3.4593	3.4657	3.4623	3.6857	2.7374	3.2672	3.0817	3.9007	4.2157	2.5948	3.1922	2.6482	3.3962	3.9803	3.3337	4.4221	4.3652	3.18	2.756	3.0335	3.3362
16800	4.337	2.8748	4.3754	3.4603	3.467	3.4631	3.6867	2.7384	3.2683	3.0822	3.9021	4.2173	2.5958	3.1931	2.6491	3.3966	3.9812	3.3347	4.4226	4.366	3.1809	2.7558	3.0337	3.3368
17600	4.3382	2.8753	4.3766	3.4612	3.4679	3.4639	3.6878	2.7393	3.269	3.0829	3.9026	4.2186	2.5962	3.1944	2.6499	3.3976	3.9818	3.3354	4.4237	4.3668	3.1822	2.7564	3.0343	3.3378
18400	4.339	2.8759	4.3775	3.4619	3.4683	3.4648	3.6886	2.7401	3.2695	3.0836	3.9035	4.2194	2.5971	3.1955	2.6511	3.3985	3.9823	3.3361	4.4248	4.3676	3.1833	2.7574	3.0347	3.3384
19200	4.34	2.8766	4.3782	3.4623	3.4689	3.4657	3.6893	2.7409	3.27	3.084	3.9046	4.2202	2.5982	3.1967	2.6516	3.3988	3.9833	3.3364	4.4254	4.3681	3.1838	2.7577	3.035	3.3388
20000	4.3406	2.877	4.3789	3.4631	3.4695	3.466	3.6893	2.7412	3.2709	3.0845	3.9055	4.2215	2.5993	3.1975	2.6522	3.3995	3.9842	3.3375	4.4266	4.369	3.1849	2.7587	3.0353	3.3393
20800	4.3416	2.8775	4.3794	3.4639	3.4701	3.4668	3.6893	2.7417	3.2713	3.0851	3.9064	4.2221	2.6	3.1981	2.6527	3.3995	3.9848	3.338	4.4273	4.3695	3.1857	2.7598	3.0358	3.34
21600	4.3425	2.8781	4.3805	3.4643	3.4704	3.4669	3.6898	2.7428	3.272	3.0859	3.9073	4.2226	2.6004	3.1981	2.6533	3.4004	3.9857	3.3385	4.428	4.3699	3.186	2.7602	3.0364	3.341
22400	4.3429	2.8784	4.3814	3.4648	3.4709	3.4673	3.6902	2.7439	3.2728	3.0858	3.9077	4.2234	2.6011	3.1988	2.6537	3.4009	3.986	3.339	4.4287	4.3707	3.1867	2.7607	3.0369	3.3411
23200	4.3432	2.8789	4.3818	3.4654	3.4709	3.4678	3.6907	2.7442	3.2729	3.0859	3.9082	4.2241	2.6023	3.1993	2.6539	3.4013	3.9863	3.3396	4.4299	4.3711	3.1872	2.7613	3.0376	3.3419
24000	4.3436	2.8794	4.3822	3.4658	3.4707	3.4684	3.691	2.7452	3.2732	3.0867	3.9088	4.2251	2.6029	3.2	2.6542	3.4015	3.9867	3.3402	4.4306	4.3719	3.1876	2.7617	3.0379	3.3418
24800	4.3439	2.8796	4.3829	3.4657	3.4709	3.469	3.6921	2.7454	3.2737	3.0872	3.9091	4.2255	2.6031	3.2007	2.6547	3.4018	3.9873	3.3404	4.4313	4.3726	3.1877	2.7615	3.0381	3.3424
25600	4.3447	2.8795	4.3835	3.4661	3.4709	3.4694	3.6925	2.7463	3.274	3.0873	3.9096	4.2263	2.6033	3.2014	2.6548	3.4015	3.9877	3.3409	4.4319	4.3731	3.1878	2.7618	3.0388	3.3429
26400	4.3457	2.8805	4.3839	3.4662	3.4716	3.4696	3.6931	2.7466	3.2741	3.0878	3.9096	4.2268	2.604	3.2016	2.6554	3.4015	3.9885	3.3413	4.4326	4.3733	3.1882	2.7623	3.039	3.3434
27200	4.3462	2.8809	4.3845	3.4663	3.4717	3.4704	3.6932	2.7473	3.2747	3.0879	3.9098	4.2282	2.6042	3.202	2.6557	3.402	3.9888	3.3418	4.4335	4.3736	3.1883	2.7626	3.0392	3.3437
28000	4.3469	2.8811	4.3849	3.4667	3.4718	3.4707	3.6933	2.7476	3.2749	3.0881	3.9101	4.2288	2.6046	3.2025	2.6559	3.4025	3.989	3.3422	4.4338	4.3739	3.1888	2.7625	3.0389	3.3437
28800	4.3477	2.8818	4.3856	3.4671	3.4722	3.4715	3.6937	2.7481	3.275	3.0887	3.9109	4.2292	2.6047	3.203	2.6559	3.403	3.9894	3.3426	4.4344	4.3743	3.1894	2.7626	3.0392	3.344
29600	4.348	2.8824	4.386	3.4672	3.4728	3.472	3.6939	2.7483	3.2759	3.0887	3.9113	4.2296	2.6051	3.2035	2.6561	3.4033	3.9899	3.3427	4.4348	4.3748	3.1897	2.7627	3.0401	3.3445
30400	4.3484	2.8831	4.3867	3.4677	3.473	3.4724	3.694	2.7487	3.2761	3.0887	3.9118	4.2302	2.6054	3.2044	2.6563	3.4035	3.9906	3.3427	4.4351	4.3753	3.1901	2.763	3.0404	3.3448
31200	4.3489	2.8831	4.387	3.4683	3.4735	3.4726	3.694	2.7492	3.2764	3.0886	3.9122	4.2305	2.6059	3.205	2.6565	3.404	3.9906	3.3427	4.4356	4.3752	3.1904	2.7634	3.0409	3.3453
32000	4.3493	2.8832	4.3872	3.4687	3.4737	3.4729	3.6942	2.7493	3.2767	3.0888	3.9122	4.231	2.6061	3.2053	2.6566	3.4045	3.9907	3.3429	4.436	4.3753	3.1905	2.7635	3.0415	3.3452
32800	4.3497	2.8834	4.3876	3.469	3.4737	3.4731	3.6945	2.7499	3.277	3.0889	3.9126	4.2311	2.6064	3.2057	2.657	3.4045	3.9906	3.3432	4.4363	4.3757	3.1905	2.7639	3.0417	3.3455
33600	4.3501	2.8841	4.3879	3.4694	3.4736	3.4738	3.6947	2.7502	3.2773	3.0891	3.9125	4.2316	2.607	3.206	2.6572	3.4047	3.9911	3.3433	4.4366	4.3757	3.1906	2.7639	3.042	3.3459
34400	4.3508	2.8842	4.3882	3.4697	3.4738	3.4744	3.6948	2.7508	3.2777	3.0889	3.9128	4.232	2.6075	3.2063	2.6573	3.4048	3.9914	3.3438	4.437	4.3762	3.1907	2.764	3.0423	3.3462
35200	4.3511	2.8841	4.3888	3.4697	3.4739	3.475	3.6947	2.7509	3.2781	3.0891	3.9134	4.2321	2.6078	3.2068	2.6573	3.405	3.9917	3.3438	4.4375	4.3763	3.1908	2.7642	3.0427	3.3465
36000	4.3513	2.8848	4.3893	3.4701	3.4739	3.4753	3.6948	2.7512	3.2781	3.0889	3.9135	4.2328	2.6081	3.2071	2.6576	3.4054	3.992	3.3439	4.438	4.3766	3.1908	2.7649	3.0428	3.3466
36800	4.3518	2.8849	4.3894	3.4704	3.4742	3.4757	3.6951	2.7514	3.2783	3.0893	3.9139	4.2332	2.6082	3.2073	2.6581	3.4057	3.9922	3.3442	4.4382	4.3768	3.1909	2.7653	3.0429	3.3469
37600	4.352	2.8849	4.3896	3.4707	3.4744	3.4759	3.6951	2.7517	3.2784	3.0897	3.9145	4.2338	2.6085	3.2074	2.6584	3.4057	3.9926	3.3442	4.4385	4.3769	3.191	2.7653	3.0429	3.3471
38400	4.3522	2.8852	4.3899	3.471	3.4747	3.4764	3.6956	2.7516	3.2784	3.0899	3.9152	4.2343	2.6086	3.2076	2.6586	3.4059	3.9929	3.3444	4.4388	4.377	3.1914	2.7654	3.0432	3.3476
39200	4.3523	2.8855	4.3903	3.4714	3.4749	3.4766	3.6957	2.7516	3.2787	3.09	3.9155	4.2346	2.6087	3.208	2.6589	3.4059	3.993	3.3445	4.4392	4.3774	3.1917	2.7655	3.0433	3.3477
40000	4.3525	2.8856	4.3906	3.4715	3.4753	3.4771	3.6958	2.752	3.2789	3.0899	3.9156	4.235	2.6088	3.2081	2.659	3.406	3.9931	3.3447	4.4394	4.3776	3.1917	2.7659	3.0433	3.3478
40800	4.3528	2.8856	4.3908	3.4716	3.4753	3.4775	3.696	2.7522	3.2787	3.09	3.9158	4.2355	2.6089	3.2082	2.6593	3.4063	3.9934	3.3448	4.4396	4.3781	3.1919	2.7659	3.0434	3.3481
41600	4.3531	2.8859	4.3911	3.4717	3.4754	3.4777	3.6962	2.7526	3.2788	3.09	3.9161	4.2359	2.609	3.2082	2.6596	3.4066	3.9935	3.3451	4.4398	4.3783	3.192	2.766	3.0434	3.3484
42400	4.3533	2.8861	4.3913	3.4719	3.4756	3.478	3.6964	2.7527	3.2789	3.0902	3.9164	4.2358	2.609	3.2084	2.6597	3.4067	3.9939	3.3453	4.4401	4.3784	3.1921	2.7659	3.0436	3.3484
43200	4.3535	2.8861	4.3917	3.4719	3.4758	3.478	3.6963	2.753	3.279	3.0905	3.9166	4.2362	2.6092	3.2087	2.6596	3.4068	3.9939	3.3457	4.4402	4.3785	3.1922	2.7663	3.0436	3.3486
44000	4.3534	2.8861	4.3919	3.4722	3.4759	3.4781	3.6965	2.7531	3.279	3.0907	3.917	4.2365	2.6093	3.2087	2.66	3.4069	3.9942	3.346	4.4402	4.3787	3.1927	2.7664	3.0439	3.3487
44800	4.3537	2.8864	4.3922	3.4722	3.476	3.4781	3.6966	2.7532	3.2794	3.0908	3.9171	4.2367	2.6095	3.2089	2.6597	3.407	3.9943	3.3463	4.4405	4.3788	3.1926	2.7665	3.044	3.3487
45600	4.3539	2.8865	4.3924	3.4723	3.4761	3.4784	3.6968	2.7535	3.2794	3.0909	3.9175	4.237	2.6094	3.209	2.6598	3.4071	3.9943	3.3463	4.4407	4.379	3.1926	2.7664	3.0442	3.3488
46400	4.354	2.8868	4.3926	3.4724	3.4761	3.4783	3.697	2.7534	3.2794	3.091	3.9179	4.2372	2.6096	3.209	2.6599	3.4073	3.9944	3.3464	4.4409	4.3792	3.1927	2.7666	3.0444	3.3487
47200	4.3542	2.8866	4.3927	3.4728	3.4763	3.4787	3.6972	2.7535	3.2799	3.0911	3.9181	4.2376	2.6096	3.2093	2.6599	3.4074	3.9943	3.3466	4.4412	4.3791	3.1928	2.7667	3.0444	3.3489
48000	4.3546	2.8868	4.393	3.4732	3.4766	3.4787	3.6973	2.7539	3.28	3.0913	3.9181	4.2377	2.6099	3.2095	2.66	3.4077	3.9945	3.3467	4.4414	4.3794	3.193	2.7667	3.0445	3.349
48800	4.3549	2.8868	4.393	3.4733	3.4767	3.479	3.6974	2.7538	3.28	3.0914	3.9186	4.2379	2.61	3.2095	2.66	3.4079	3.9948	3.3467	4.4415	4.3795	3.1931	2.7669	3.0447	3.3492
49600	4.355	2.887	4.3931	3.4735	3.4768	3.4791	3.6977	2.754	3.2802	3.0914	3.9187	4.238	2.6101	3.2095	2.6598	3.4081	3.995	3.3468	4.4419	4.3797	3.1932	2.7673	3.0449	3.3493
50400	4.3552	2.8871	4.3933	3.4736	3.4768	3.4793	3.6976	2.7541	3.2803	3.0915	3.9188	4.2381	2.6101	3.2096	2.66	3.4083	3.9952	3.3467	4.4419	4.3799	3.1932	2.7675	3.0452	3.3495
51200	4.3553	2.8871	4.3934	3.4737	3.4769	3.4796	3.6975	2.7543	3.2803	3.0914	3.9191	4.2383	2.6102	3.2097	2.66	3.4084	3.9954	3.3469	4.442	4.3801	3.1932	2.7676	3.0453	3.3495
52000	4.3555	2.887	4.3935	3.4739	3.4771	3.4796	3.6976	2.7543	3.2803	3.0916	3.9191	4.2384	2.6104	3.2098	2.66	3.4085	3.9955	3.3471	4.4422	4.3803	3.1933	2.7676	3.0454	3.3495
52800	4.3558	2.8869	4.3936	3.474	3.4772	3.4798	3.6977	2.7544	3.2804	3.0914	3.9191	4.2385	2.6105	3.2097	2.6603	3.4085	3.9958	3.3471	4.4424	4.3804	3.1934	2.7677	3.0455	3.3496
53600	4.356	2.887	4.3937	3.4741	3.4774	3.4799	3.6979	2.7545	3.2806	3.0914	3.9193	4.2386	2.6107	3.2097	2.6604	3.4086	3.9958	3.3473	4.4425	4.3806	3.1937	2.7678	3.0456	3.3497
54400	4.3562	2.8871	4.3939	3.4741	3.4776	3.4801	3.698	2.7545	3.2808	3.0913	3.9194	4.2387	2.6107	3.2098	2.6605	3.4085	3.9958	3.3474	4.4428	4.3808	3.1938	2.7677	3.0455	3.3498
55200	4.3565	2.8872	4.3939	3.4744	3.4778	3.48	3.6981	2.7547	3.2808	3.0911	3.9196	4.2389	2.6107	3.2098	2.6608	3.4087	3.9959	3.3473	4.4431	4.3809	3.1938	2.7679	3.0458	3.3498
56000	4.3565	2.8873	4.3942	3.4745	3.478	3.4802	3.6982	2.7548	3.2808	3.0913	3.9197	4.2391	2.6108	3.2099	2.6608	3.4087	3.9959	3.3474	4.4434	4.3808	3.194	2.768	3.0457	3.35
56800	4.3566	2.8873	4.3943	3.4748	3.478	3.48	3.6981	2.755	3.2809	3.0913	3.92	4.2394	2.6109	3.2101	2.6608	3.4087	3.996	3.3476	4.4435	4.3808	3.1941	2.7681	3.0458	3.3503
57600	4.3566	2.8876	4.3944	3.4749	3.4779	3.4803	3.6982	2.7551	3.281	3.0914	3.9201	4.2396	2.611	3.2102	2.6609	3.4088	3.9959	3.3478	4.4437	4.3809	3.1942	2.7681	3.046	3.3503
58400	4.3567	2.8876	4.3947	3.4752	3.478	3.4803	3.6981	2.7552	3.2811	3.0916	3.9204	4.2397	2.611	3.2102	2.661	3.409	3.9961	3.3479	4.444	4.3811	3.1943	2.7681	3.0463	3.3505
59200	4.3569	2.8878	4.3948	3.4753	3.478	3.4804	3.698	2.7552	3.2811	3.0916	3.9205	4.24	2.6112	3.2104	2.6612	3.409	3.9961	3.3478	4.444	4.3813	3.1943	2.7681	3.0464	3.3507
60000	4.3569	2.8877	4.395	3.4753	3.4781	3.4806	3.6981	2.7554	3.2812	3.0916	3.9206	4.2402	2.6114	3.2104	2.6612	3.4091	3.9962	3.3478	4.4441	4.3815	3.1945	2.7679	3.0464	3.3509
60800	4.357	2.8875	4.3952	3.4753	3.478	3.4807	3.6983	2.7555	3.2811	3.0918	3.9204	4.2404	2.6115	3.2105	2.6615	3.4091	3.9963	3.3478	4.4443	4.3817	3.1946	2.7681	3.0465	3.3507
61600	4.3568	2.8876	4.3952	3.4753	3.478	3.4807	3.6985	2.7557	3.2811	3.092	3.9205	4.2404	2.6113	3.2106	2.6616	3.4092	3.9965	3.348	4.4446	4.3818	3.1948	2.7681	3.0466	3.3508
62400	4.357	2.8877	4.3953	3.4754	3.4781	3.4807	3.6985	2.7559	3.2812	3.0921	3.9206	4.2405	2.6115	3.2107	2.6615	3.4093	3.9966	3.348	4.4448	4.3819	3.195	2.7683	3.0467	3.351
63200	4.3572	2.8877	4.3955	3.4753	3.4783	3.4807	3.6987	2.7558	3.2812	3.0923	3.9209	4.2407	2.6116	3.2109	2.6615	3.4094	3.9966	3.3481	4.4448	4.3819	3.1949	2.7683	3.0469	3.3509
64000	4.3574	2.8878	4.3956	3.4754	3.4781	3.4808	3.6988	2.7558	3.2812	3.0922	3.9209	4.2406	2.6117	3.2111	2.6615	3.4094	3.9966	3.3483	4.4448	4.382	3.195	2.7684	3.0469	3.3511
64800	4.3576	2.8879	4.3957	3.4755	3.4782	3.481	3.6988	2.7559	3.2811	3.0922	3.9211	4.2407	2.6118	3.2108	2.6615	3.4095	3.9968	3.3485	4.4449	4.3821	3.195	2.7685	3.047	3.3511
65600	4.3577	2.8881	4.3959	3.4758	3.4783	3.4809	3.6987	2.7558	3.2811	3.0922	3.9211	4.2409	2.6116	3.211	2.6616	3.4095	3.9969	3.3486	4.4451	4.382	3.1949	2.7686	3.0469	3.3511
66400	4.3578	2.8882	4.396	3.4759	3.4785	3.4808	3.6988	2.756	3.2811	3.0923	3.9211	4.241	2.6115	3.2111	2.6616	3.4096	3.9969	3.3488	4.4452	4.3821	3.195	2.7686	3.047	3.3512
67200	4.3579	2.8883	4.3961	3.4759	3.4786	3.4808	3.6987	2.7561	3.2811	3.0926	3.9212	4.2412	2.6115	3.2112	2.6616	3.4096	3.997	3.349	4.4453	4.3822	3.1951	2.7689	3.047	3.3514
68000	4.3579	2.8885	4.3961	3.476	3.4785	3.4811	3.6986	2.7561	3.2812	3.0928	3.9214	4.2413	2.6115	3.2112	2.6615	3.4097	3.9971	3.3489	4.4453	4.3823	3.1952	2.769	3.047	3.3514
68800	4.3581	2.8887	4.3963	3.4759	3.4786	3.4812	3.6987	2.7562	3.2814	3.0929	3.9217	4.2416	2.6114	3.2113	2.6616	3.4097	3.9974	3.349	4.4453	4.3823	3.1951	2.769	3.0471	3.3514
69600	4.3581	2.8889	4.3964	3.476	3.4786	3.4812	3.6989	2.7562	3.2814	3.0931	3.9219	4.2419	2.6115	3.2113	2.6615	3.4098	3.9975	3.3491	4.4455	4.3824	3.1952	2.769	3.0471	3.3513
70400	4.3582	2.8889	4.3965	3.4761	3.4786	3.4812	3.6991	2.7563	3.2814	3.0934	3.9219	4.2419	2.6115	3.2113	2.6613	3.4099	3.9976	3.3492	4.4457	4.3825	3.1953	2.7691	3.0472	3.3513
71200	4.3582	2.889	4.3966	3.4761	3.4787	3.4814	3.6993	2.7563	3.2815	3.0934	3.9218	4.2421	2.6116	3.2116	2.6613	3.4101	3.9976	3.3492	4.4458	4.3825	3.1954	2.7693	3.0472	3.3513
72000	4.3584	2.8891	4.3968	3.4761	3.4787	3.4814	3.6994	2.7565	3.2815	3.0935	3.9219	4.2423	2.6116	3.2116	2.6613	3.4102	3.9977	3.3493	4.4459	4.3826	3.1954	2.7693	3.0473	3.3515
72800	4.3584	2.8891	4.3968	3.4762	3.4787	3.4815	3.6994	2.7564	3.2815	3.0935	3.9219	4.2423	2.6116	3.2117	2.6614	3.4102	3.9978	3.3495	4.4459	4.3828	3.1954	2.7694	3.0474	3.3514
73600	4.3585	2.889	4.3969	3.4765	3.4787	3.4816	3.6996	2.7566	3.2813	3.0936	3.922	4.2422	2.6118	3.2117	2.6614	3.4102	3.9979	3.3495	4.4461	4.3828	3.1955	2.7695	3.0474	3.3514
74400	4.3585	2.8892	4.397	3.4765	3.4787	3.4818	3.6996	2.7566	3.2814	3.0937	3.922	4.2423	2.612	3.2118	2.6614	3.4104	3.9978	3.3495	4.4463	4.383	3.1956	2.7697	3.0475	3.3516
75200	4.3585	2.8892	4.397	3.4765	3.4789	3.4818	3.6997	2.7566	3.2814	3.0935	3.9221	4.2424	2.612	3.2119	2.6614	3.4105	3.9979	3.3496	4.4463	4.3831	3.1957	2.7696	3.0475	3.3516
76000	4.3586	2.8893	4.3972	3.4766	3.4789	3.4818	3.6999	2.7568	3.2814	3.0935	3.9222	4.2424	2.6122	3.2119	2.6615	3.4106	3.998	3.3497	4.4464	4.3831	3.1957	2.7697	3.0475	3.3516
76800	4.3587	2.8893	4.3972	3.4766	3.4789	3.4819	3.7	2.7567	3.2815	3.0933	3.9224	4.2425	2.6122	3.2118	2.6616	3.4106	3.998	3.3498	4.4465	4.3833	3.196	2.7696	3.0477	3.3517
77600	4.3588	2.8893	4.3973	3.4766	3.479	3.482	3.7	2.7567	3.2816	3.0934	3.9224	4.2427	2.6122	3.2119	2.6617	3.4107	3.9981	3.3497	4.4466	4.3833	3.196	2.7697	3.0478	3.3518
78400	4.3589	2.8893	4.3974	3.4767	3.4789	3.4819	3.7001	2.7566	3.2815	3.0935	3.9225	4.2428	2.6122	3.212	2.6617	3.4107	3.9982	3.3497	4.4465	4.3834	3.196	2.7698	3.0478	3.3518
79200	4.359	2.8894	4.3974	3.4767	3.479	3.482	3.7001	2.7567	3.2814	3.0935	3.9225	4.2427	2.6123	3.2121	2.6618	3.4106	3.9982	3.3497	4.4465	4.3834	3.196	2.7699	3.0478	3.3518
80000	4.3591	2.8896	4.3976	3.4767	3.479	3.4821	3.7001	2.7566	3.2813	3.0936	3.9227	4.2428	2.6123	3.2121	2.6618	3.4108	3.9982	3.3497	4.4466	4.3834	3.1959	2.77	3.0478	3.3521
80800	4.3593	2.8895	4.3976	3.4768	3.4791	3.4821	3.7002	2.7565	3.2814	3.0937	3.9227	4.2428	2.6123	3.2122	2.6618	3.4108	3.9984	3.3496	4.4468	4.3835	3.1959	2.7699	3.0479	3.3521
81600	4.3594	2.8896	4.3977	3.4769	3.4791	3.4822	3.7002	2.7566	3.2815	3.0937	3.9227	4.2429	2.6123	3.2124	2.6619	3.4107	3.9985	3.3497	4.4469	4.3835	3.1959	2.77	3.048	3.3522
82400	4.3595	2.8896	4.3977	3.477	3.479	3.4822	3.7	2.7567	3.2817	3.0936	3.9228	4.2429	2.6122	3.2125	2.6619	3.4108	3.9985	3.3497	4.4471	4.3835	3.1958	2.7701	3.048	3.3523
83200	4.3595	2.8896	4.3978	3.477	3.4791	3.4823	3.7	2.757	3.2816	3.0936	3.9229	4.243	2.6124	3.2126	2.6619	3.4108	3.9985	3.3498	4.4472	4.3835	3.1959	2.7702	3.048	3.3523
83757	4.3595	2.8897	4.3977	3.477	3.4791	3.4823	3.7	2.7569	3.2817	3.0937	3.923	4.2431	2.6124	3.2126	2.6619	3.4108	3.9985	3.3497	4.4473	4.3835	3.1959	2.7703	3.048	3.3523

## Sheet: Fig.5B PCoA
	PC1	PC2	PC3	PC4	PC5	PC6	PC7	PC8	PC9	PC10	PC11	PC12	PC13	PC14	PC15	PC16	PC17	PC18	PC19	PC20	PC21	PC22	PC23	PC24	PC25
CON_1	0.139066	-0.204486	0.00304393	-0.137078	-0.0690576	-0.0740742	0.0854391	-0.0801445	-0.0148286	-0.0108332	-0.0182072	0.00225929	-0.0180246	-0.0267919	-0.0663429	-0.0208917	0.010104	0.0213987	-0.0369627	0.0359949	-0.0487046	-0.00743832	0.0142784	-0.00486822	1.79949e-09
CON_2	0.169082	-0.252681	-0.0267665	-0.0731643	-0.0738405	-0.0880742	0.0490915	-0.0222524	-0.027609	0.0600105	-0.0162158	0.0361022	-0.0437902	-0.00672539	0.0391622	0.0196774	0.0171862	-0.0563235	0.0216339	-0.0121611	0.0659095	-0.015636	0.00621368	0.00537008	1.79949e-09
CON_3	0.076065	-0.282126	-0.086732	-0.104325	-0.168292	-0.00354252	-0.00623871	0.0898627	-0.0443404	0.0704279	-0.0367042	-0.0252484	-0.0185513	-0.00378288	0.0784191	0.054436	-0.0718931	0.0470159	-0.0133926	0.00914986	-0.0211567	0.00959063	-0.014097	-0.000949528	1.79949e-09
CON_4	-0.195183	-0.232959	-0.181066	-0.154051	0.165539	0.121449	-0.107307	-0.0135798	-0.144218	-0.0177913	-0.114498	0.0128429	-0.0248765	-0.0206493	-0.023531	-0.0258306	0.00614454	-0.0291048	0.0122224	-0.0124417	-0.000680371	-0.00346318	0.00334887	-0.00320556	1.79949e-09
CON_5	0.0407316	-0.205098	-0.120363	-0.136652	0.109373	0.0545798	-0.00146551	0.147069	0.0509578	0.00759294	0.143939	0.0371522	0.000610313	0.0862499	-0.0784348	-0.011886	-0.019705	0.023513	0.00324602	0.0137146	0.0154827	0.00691257	0.00563979	0.0025051	1.79949e-09
CON_6	-0.0722599	-0.219429	-0.196536	-0.0994119	-0.0786384	0.0380145	0.0174349	-0.0947351	0.148473	-0.0437613	0.0916155	-0.00384391	0.0501325	-0.0667858	0.0504964	-0.0269431	0.0604352	-0.0241076	0.00658566	-0.00913073	-0.018829	0.00998187	-0.00906925	0.000502693	1.79949e-09
FXT_1	-0.164068	0.139339	0.0820605	-0.10467	0.0593049	-0.120587	-0.21255	0.108919	0.0342851	-0.0593358	0.02026	0.058243	0.000370577	-0.0211634	0.0784109	-0.00404638	0.0294337	0.0107391	0.0056706	0.0259343	-0.00110597	-0.00403178	0.00922432	-0.00180486	1.79949e-09
FXT_2	-0.222469	-0.059746	0.147669	-0.0670761	-0.107271	-0.0462482	-0.0927785	-0.184817	-0.0166341	-0.0327998	-0.000770793	0.0622816	0.0276471	0.118664	-0.00242534	0.00580316	0.00421596	0.0432895	0.000831222	-0.0311949	-0.00508832	0.00151877	-0.00304574	0.00225495	1.79949e-09
FXT_3	-0.103132	0.0691172	0.223886	-0.129743	-0.0148389	-0.0567733	-0.0136119	0.0128434	0.0620569	-0.0603951	-0.0286795	-0.00152238	-0.038151	-0.0790399	-0.0510095	-0.0388916	-0.0618907	-0.0266429	-0.00422808	-0.00584778	-0.0160193	-0.00606001	0.000265972	0.00431323	1.79949e-09
FXT_4	0.00287197	0.0636435	0.14213	-0.149074	-0.0708333	0.025061	-0.0121779	0.0272895	0.0211592	0.0572769	-0.0232989	-0.133986	0.0428029	0.0192027	-0.0380616	-0.0369834	0.0467331	0.00692147	0.0533955	-0.00606924	0.0385993	-0.00242648	-0.0111568	-0.00719006	1.79949e-09
FXT_5	0.257296	0.000411159	0.116921	-0.0519329	0.207902	-0.024897	-0.0271645	-0.0552439	-0.0206761	0.0327195	-0.0142733	-0.0238379	0.0448576	-0.0286763	0.00772021	-0.00752057	-0.0148639	0.0266798	-0.0415716	-0.0294368	0.0166809	-0.00368357	-0.00853028	0.00637851	1.79949e-09
FXT_6	0.0689105	0.050753	0.182987	-0.103976	0.000260092	-0.0198554	0.0274375	0.0123628	-0.021889	0.0200653	0.0420678	-0.124888	-0.0064822	0.0487647	0.0349702	0.00911451	0.011314	-0.0391865	-0.0557756	0.0218986	-0.00687037	-0.00512092	0.00961545	0.0017803	1.79949e-09
CUMS_1	0.15832	0.060626	0.189409	-0.0116169	0.000544993	-0.0275842	0.0733891	-0.0421685	-0.0213172	0.0078111	0.0176438	0.0696773	-0.0901403	-0.0148445	-0.0129443	0.0178167	-0.0122345	0.0144271	0.0740534	0.0095771	-0.00546075	0.0292877	-0.00423316	-0.00154385	1.79949e-09
CUMS_2	0.1423	0.120247	0.0191944	0.0395677	-0.0994546	0.0424445	0.0042309	0.0716341	-0.0646991	-0.020847	0.0319482	0.0523148	-0.0414974	-0.0171284	-0.01859	-0.0527381	0.02728	-0.0415561	-0.0423488	-0.0264269	0.00967634	0.0361781	-0.0106658	0.00123575	1.79949e-09
CUMS_3	0.170859	0.156344	0.0210633	0.038802	-0.0638239	0.101749	0.0410216	0.004429	0.0150769	0.073348	0.0200009	0.0773768	-0.0360299	-0.0304	0.0224147	-0.0103052	0.0361168	0.0466629	-0.00385922	-0.00591546	0.0154452	-0.0382403	0.0183132	-0.00256847	1.79949e-09
CUMS_4	0.23467	-0.00967078	0.0238612	0.14522	0.0312215	0.0802886	-0.0682022	-0.0428862	-0.0194799	0.00442207	0.0449445	0.0459711	0.0528846	-0.0404225	-0.0290664	-0.00699737	-0.0226794	0.0214353	-0.0237584	0.0323473	0.0184497	-0.0238878	-0.0250747	-0.00271011	1.79949e-09
CUMS_5	0.139986	0.138008	-0.0414277	0.048646	0.00262293	-0.0806639	0.0536293	0.0278029	-0.0457257	-0.0407011	0.0380283	0.0360788	0.0220989	0.0703994	0.0434802	-0.0403448	-0.0498043	-0.0710088	0.0100177	-0.0227716	-0.0314673	-0.0240366	-0.0083775	-0.00705714	1.79949e-09
CUMS_6	0.267791	0.0855611	0.0352584	0.0664053	0.0957329	-0.010313	-0.0709693	-0.0514019	-0.0328526	0.0258991	0.0101736	-0.0069368	0.0438592	-0.0145205	0.00866491	0.0686825	0.0243648	-0.0208843	0.00460566	0.0402069	-0.00254862	0.0344197	0.00697493	-0.00300796	1.79949e-09
SBF-H_1	-0.353185	-0.167318	0.0950155	0.284266	-0.090425	-0.00521486	-0.0954549	0.0458442	0.108064	0.0931805	-0.0457272	-0.00893807	-0.0586093	0.00404355	-0.0317253	-0.00755208	-0.00668193	-0.0195033	-0.0185946	0.00950662	0.00169679	-0.00242108	-0.00450288	-0.000924948	1.79949e-09
SBF-H_2	-0.384576	-0.0706332	0.137856	0.156039	-0.102488	0.182096	0.0445219	0.00581867	-0.156905	-0.0536103	0.0897815	-0.0272672	0.0513002	-0.0294143	0.0161541	0.00595113	-0.00501604	-0.00274178	0.0131468	0.00984994	-0.00164094	-0.0007716	0.010799	0.00282113	1.79949e-09
SBF-H_3	-0.404245	-0.155445	0.110802	0.0700117	0.269176	-0.0840441	0.190938	0.0240813	0.0339958	0.0161292	-0.000654984	0.0206267	0.0282904	-0.014584	0.0306728	0.0204864	0.00065017	0.0108484	0.00696201	-0.00431693	0.00237856	-0.000535851	-0.00571289	-0.00250206	1.79949e-09
SBF-H_4	-0.200545	0.315174	-0.102589	-0.0490726	0.0230881	0.0550622	0.0627569	0.00728717	0.00491447	0.156681	-0.0551837	0.0370621	0.0230343	0.0173624	0.0218078	-0.0472498	0.0213726	0.0200339	-0.0305251	-0.0147607	-0.0205019	0.020842	0.00272958	0.000749874	1.79949e-09
SBF-H_5	-0.0756753	0.234953	-0.0321329	-0.127848	0.00577069	0.225229	0.037639	-0.0330283	0.116439	-0.058703	-0.0578439	0.022396	-0.0218261	0.0299944	-0.00970489	0.103362	-0.025188	-0.0426603	-0.0152124	0.00865097	0.00932308	-0.00630136	-0.00302066	-0.00056049	1.79949e-09
SBF-H_6	0.054644	0.19885	-0.0967305	-0.0259972	-0.0642105	-0.000403079	0.0411477	0.0548507	0.000105107	-0.0215336	-0.0819776	-0.00570562	0.08066	0.00108798	0.000307489	-0.0347962	-0.0160447	0.0148448	0.0576602	0.0417162	-0.0178991	-0.00890326	-0.00291386	0.00870404	1.79949e-09

## Sheet: Fig.5C Community
OTU ID	SBF-H	control	fluoxetin	CUMS
d__Bacteria; k__norank_d__Bacteria; p__Firmicutes; c__Bacilli; o__Lactobacillales; f__Lactobacillaceae; g__Lactobacillus	0.146304	0.312187	0.325173	0.509748
d__Bacteria; k__norank_d__Bacteria; p__Bacteroidota; c__Bacteroidia; o__Bacteroidales; f__Muribaculaceae; g__norank_f__Muribaculaceae	0.284127	0.354936	0.339641	0.191276
d__Bacteria; k__norank_d__Bacteria; p__Verrucomicrobiota; c__Verrucomicrobiae; o__Verrucomicrobiales; f__Akkermansiaceae; g__Akkermansia	0.134249	0.00897636	0.0882454	0.0972774
d__Bacteria; k__norank_d__Bacteria; p__Firmicutes; c__Bacilli; o__Erysipelotrichales; f__Erysipelotrichaceae; g__Ileibacterium	0.0458549	0.00109245	0.0143292	0.0502983
d__Bacteria; k__norank_d__Bacteria; p__Firmicutes; c__Clostridia; o__Clostridia_UCG-014; f__norank_o__Clostridia_UCG-014; g__norank_f__norank_o__Clostridia_UCG-014	0.0320849	0.0271937	0.0156007	0.0158116
d__Bacteria; k__norank_d__Bacteria; p__Firmicutes; c__Clostridia; o__Lachnospirales; f__Lachnospiraceae; g__Lachnospiraceae_NK4A136_group	0.0515101	0.0233393	0.00249332	0.00799137
d__Bacteria; k__norank_d__Bacteria; p__Firmicutes; c__Clostridia; o__Lachnospirales; f__Lachnospiraceae; g__unclassified_f__Lachnospiraceae	0.0365203	0.0125522	0.0061567	0.010423
d__Bacteria; k__norank_d__Bacteria; p__Firmicutes; c__Clostridia; o__Lachnospirales; f__Lachnospiraceae; g__norank_f__Lachnospiraceae	0.0293985	0.00769289	0.0158614	0.0111593
d__Bacteria; k__norank_d__Bacteria; p__Firmicutes; c__Bacilli; o__Erysipelotrichales; f__Erysipelotrichaceae; g__Dubosiella	0.0115891	0.00969073	0.0362358	0.00561147
d__Bacteria; k__norank_d__Bacteria; p__Bacteroidota; c__Bacteroidia; o__Bacteroidales; f__Bacteroidaceae; g__Bacteroides	0.0209236	0.0128168	0.0134058	0.00274803
d__Bacteria; k__norank_d__Bacteria; p__Firmicutes; c__Clostridia; o__Lachnospirales; f__Lachnospiraceae; g__Eubacterium_fissicatena_group	0.0178254	0.0079456	0.0110797	0.00275201
d__Bacteria; k__norank_d__Bacteria; p__Patescibacteria; c__Saccharimonadia; o__Saccharimonadales; f__Saccharimonadaceae; g__Candidatus_Saccharimonas	0.00718348	0.0190452	0.00536473	0.00542442
d__Bacteria; k__norank_d__Bacteria; p__Bacteroidota; c__Bacteroidia; o__Bacteroidales; f__Marinifilaceae; g__Odoribacter	0.00758146	0.0108648	0.00566719	0.0103016
d__Bacteria; k__norank_d__Bacteria; p__Desulfobacterota; c__Desulfovibrionia; o__Desulfovibrionales; f__Desulfovibrionaceae; g__norank_f__Desulfovibrionaceae	0.0158076	0.0109742	0.00248536	0.00514584
d__Bacteria; k__norank_d__Bacteria; p__Campilobacterota; c__Campylobacteria; o__Campylobacterales; f__Helicobacteraceae; g__Helicobacter	0.0086938	0.0126656	0.00217693	0.0044255
d__Bacteria; k__norank_d__Bacteria; p__Bacteroidota; c__Bacteroidia; o__Bacteroidales; f__Rikenellaceae; g__Alistipes	0.006294	0.0101166	0.00545427	0.00314203
d__Bacteria; k__norank_d__Bacteria; p__Firmicutes; c__Bacilli; o__Erysipelotrichales; f__Erysipelatoclostridiaceae; g__Erysipelatoclostridium	0.00771279	0.00225653	0.0103156	0.000612884
d__Bacteria; k__norank_d__Bacteria; p__Deferribacterota; c__Deferribacteres; o__Deferribacterales; f__Deferribacteraceae; g__Mucispirillum	0.00337484	0.0144048	0.000533289	0.000714368
others	0.132964	0.14125	0.0997807	0.0651368

## Sheet: Fig.5D LEfSe
Species name	group	Mean	LDA_value	Pvalue
p__Firmicutes.c__Clostridia	SBF-H	5.30918	4.68889	0.0155813
p__Proteobacteria.c__Gammaproteobacteria.o__Enterobacterales.f__Enterobacteriaceae.g__Citrobacter		0.900888		-
p__Proteobacteria.c__Gammaproteobacteria.o__Pseudomonadales.f__Pseudomonadaceae		0.474919		-
p__Acidobacteriota.c__Vicinamibacteria		0.173889		-
p__Proteobacteria.c__Gammaproteobacteria.o__Pseudomonadales.f__Moraxellaceae.g__Acinetobacter		2.40689		-
p__Actinobacteriota.c__MB-A2-108.o__norank_c__MB-A2-108.f__norank_o__norank_c__MB-A2-108.g__norank_f__norank_o__norank_c__MB-A2-108		0		-
p__Firmicutes.c__Clostridia.o__Eubacteriales		1.85513		-
p__Firmicutes.c__Bacilli.o__Lactobacillales.f__Carnobacteriaceae.g__Granulicatella		0		-
p__Actinobacteriota.c__Actinobacteria.o__Micrococcales.f__Brevibacteriaceae.g__Brevibacterium		0		-
p__Cyanobacteria.c__Vampirivibrionia	fluoxetin	3.62151	3.23188	0.00179427
p__Firmicutes.c__Clostridia.o__Lachnospirales.f__Lachnospiraceae.g__Acetitomaculum		0.65101		-
p__Firmicutes.c__Clostridia.o__unclassified_c__Clostridia.f__unclassified_c__Clostridia		2.85784		0.022867
p__Bacteroidota.c__Bacteroidia.o__Bacteroidales.f__Prevotellaceae.g__Prevotellaceae_UCG-001	control	3.88645	3.566	0.0133114
p__Firmicutes.c__unclassified_p__Firmicutes.o__unclassified_p__Firmicutes		2.87402		0.0044286
p__Deferribacterota.c__Deferribacteres.o__Deferribacterales.f__Deferribacteraceae.g__Mucispirillum	control	4.07795	3.72794	0.00117858
p__Myxococcota.c__Polyangia.o__Haliangiales.f__Haliangiaceae.g__Haliangium		0.173889		-
p__Firmicutes.c__Clostridia.o__Lachnospirales.f__Defluviitaleaceae		2.26379		-
p__Bacteroidota.c__Bacteroidia.o__Bacteroidales.f__Muribaculaceae.g__unclassified_f__Muribaculaceae		1.71796		-
p__Firmicutes.c__Clostridia.o__Eubacteriales.f__Anaerofustaceae.g__Anaerofustis		1.85513		-
p__Patescibacteria.c__Saccharimonadia.o__Saccharimonadales.f__Saccharimonadaceae	control	4.29702	3.84535	0.00244317
p__Firmicutes.c__Clostridia.o__norank_c__Clostridia.f__Hungateiclostridiaceae.g__Ruminiclostridium		2.17389		-
p__unclassified_k__norank_d__Bacteria		2.79089		-
p__Acidobacteriota.c__Blastocatellia		0		-
p__Actinobacteriota.c__Acidimicrobiia		0.173889		-
p__Firmicutes.c__Clostridia.o__Lachnospirales.f__Lachnospiraceae.g__Acetatifactor		2.59384		0.0311136
p__Actinobacteriota.c__Actinobacteria.o__Propionibacteriales.f__Propionibacteriaceae.g__Raineyella		0.173889		-
p__Verrucomicrobiota.c__Lentisphaeria.o__Victivallales.f__Victivallaceae.g__Victivallis		0.474919		-
p__Firmicutes.c__Clostridia.o__Oscillospirales	control	4.53475	3.96546	0.0263893
p__Deinococcota.c__Deinococci.o__Deinococcales		0.474919		-
p__Fusobacteriota.c__Fusobacteriia.o__Fusobacteriales.f__Leptotrichiaceae.g__Leptotrichia		0		-
p__Firmicutes.c__Bacilli.o__Erysipelotrichales.f__Erysipelotrichaceae.g__Dubosiella		4.45003		-
p__Myxococcota.c__Myxococcia.o__Myxococcales.f__Anaeromyxobacteraceae		0.474919		-
p__Bacteroidota.c__Bacteroidia.o__Flavobacteriales.f__Flavobacteriaceae	SBF-H	2.01274	3.08643	0.00555496
p__Fibrobacterota.c__Fibrobacteria.o__Fibrobacterales.f__norank_o__Fibrobacterales		0		-
p__Actinobacteriota.c__Actinobacteria.o__Micrococcales.f__Cellulomonadaceae.g__Pseudactinotalea		0.173889		-
p__Firmicutes.c__norank_p__Firmicutes		1.67904		0.0421256
p__Bdellovibrionota.c__Bdellovibrionia.o__Bdellovibrionales		0.173889		-
p__Firmicutes.c__Clostridia.o__Oscillospirales.f__Ruminococcaceae.g__unclassified_f__Ruminococcaceae		3.25488		0.0291554
p__Proteobacteria.c__Alphaproteobacteria.o__Rhodobacterales.f__Rhodobacteraceae.g__unclassified_f__Rhodobacteraceae		0.474919		-
p__Chloroflexi.c__Anaerolineae.o__unclassified_c__Anaerolineae.f__unclassified_c__Anaerolineae.g__unclassified_c__Anaerolineae		0		-
p__Firmicutes.c__Clostridia.o__Lachnospirales.f__Lachnospiraceae.g__Lachnospiraceae_FCS020_group		1.88989		-
p__Bacteroidota.c__Bacteroidia.o__Bacteroidales.f__Prevotellaceae	control	4.28807	3.91438	0.0144148
p__Proteobacteria.c__Gammaproteobacteria.o__Enterobacterales		1.80736		-
p__Chloroflexi.c__KD4-96.o__norank_c__KD4-96		0.173889		-
p__Firmicutes.c__Clostridia.o__Peptostreptococcales-Tissierellales.f__Peptostreptococcaceae.g__Peptostreptococcus		0.65101		-
p__Proteobacteria.c__Gammaproteobacteria.o__Burkholderiales.f__Rhodocyclaceae.g__Azonexus		0		-
p__Desulfobacterota.c__Desulfovibrionia.o__Desulfovibrionales.f__Desulfovibrionaceae.g__Desulfovibrio		3.94156		-
p__Proteobacteria.c__Gammaproteobacteria.o__Burkholderiales.f__Alcaligenaceae.g__Alcaligenes		1.14393		-
p__Firmicutes.c__Clostridia.o__Lachnospirales.f__Lachnospiraceae.g__unclassified_f__Lachnospiraceae	SBF-H	4.49358	4.02865	0.0259286
p__Bacteroidota.c__Bacteroidia.o__unclassified_c__Bacteroidia		1.07698		-
p__Gemmatimonadota		0.474919		-
p__Firmicutes.c__Symbiobacteriia.o__Symbiobacteriales		0		-
p__Deferribacterota	control	4.07795	3.72794	0.00117858
p__Firmicutes.c__Clostridia.o__Peptostreptococcales-Tissierellales.f__Peptostreptococcaceae.g__Romboutsia		3.62306		-
p__Bacteroidota.c__Bacteroidia.o__Flavobacteriales.f__NS9_marine_group		0		-
p__Proteobacteria.c__Gammaproteobacteria.o__Burkholderiales.f__Rhodocyclaceae.g__unclassified_f__Rhodocyclaceae		0		-
p__Bacteroidota.c__Bacteroidia.o__Bacteroidales.f__Prevotellaceae.g__Alloprevotella		3.98142		-
p__Firmicutes.c__Clostridia.o__Lachnospirales.f__Lachnospiraceae.g__Roseburia		3.0748		0.0183029
p__Bacteroidota.c__Bacteroidia.o__Chitinophagales		0.173889		-
p__Bacteroidota.c__Bacteroidia	fluoxetin	5.63581	5.07941	0.0181548
p__Firmicutes.c__Clostridia.o__Oscillospirales.f__Eubacterium_coprostanoligenes_group.g__norank_f__Eubacterium_coprostanoligenes_group		3.53844		-
p__Firmicutes.c__Clostridia.o__Clostridia_UCG-014.f__norank_o__Clostridia_UCG-014		4.45161		-
p__Actinobacteriota.c__Actinobacteria.o__Micrococcales	CUMS	1.69677	3.35331	0.0136768
p__Fibrobacterota.c__Fibrobacteria.o__Fibrobacterales		0		-
p__Actinobacteriota.c__Coriobacteriia.o__Coriobacteriales.f__Coriobacteriales_Incertae_Sedis		1.12813		-
p__Firmicutes.c__Clostridia.o__Peptococcales		3.14978		-
p__Patescibacteria.c__Saccharimonadia.o__Saccharimonadales.f__Saccharimonadaceae.g__Candidatus_Saccharimonas	control	4.29702	3.84543	0.00244317
p__Actinobacteriota.c__Thermoleophilia.o__Solirubrobacterales.f__67-14.g__norank_f__67-14		0.65101		-
p__Deinococcota.c__Deinococci.o__Deinococcales.f__Trueperaceae		0.474919		-
p__Firmicutes.c__Bacilli.o__Staphylococcales.f__Staphylococcaceae	control	3.29347	3.07986	6.91041e-05
p__Proteobacteria.c__Gammaproteobacteria.o__Burkholderiales.f__Comamonadaceae.g__Hydrogenophaga		0.173889		-
p__Actinobacteriota.c__Actinobacteria.o__Propionibacteriales.f__Nocardioidaceae		0.173889		-
p__Firmicutes.c__Bacilli.o__Bacillales.f__Planococcaceae		1.14393		-
p__Proteobacteria.c__Alphaproteobacteria.o__Rhodospirillales.f__norank_o__Rhodospirillales.g__norank_f__norank_o__Rhodospirillales		2.98007		-
p__Firmicutes.c__Clostridia.o__Peptostreptococcales-Tissierellales	control	3.92877	3.5093	0.0167287
p__Proteobacteria.c__Gammaproteobacteria.o__Alteromonadales.f__Marinobacteraceae.g__Marinobacter		0		-
p__Firmicutes.c__Negativicutes.o__Veillonellales-Selenomonadales		0.775949		-
p__Proteobacteria.c__Gammaproteobacteria.o__Enterobacterales.f__Morganellaceae		1.25307		-
p__Desulfobacterota.c__Desulfovibrionia	SBF-H	4.44319	3.96157	0.0237642
p__Firmicutes.c__Clostridia.o__Caldicoprobacterales		1.42916		-
p__Proteobacteria.c__Gammaproteobacteria.o__Pseudomonadales.f__Moraxellaceae.g__Cavicella		0		-
p__Actinobacteriota.c__Actinobacteria		3.61856		-
p__Chloroflexi.c__Anaerolineae		0.65101		-
p__Firmicutes.c__Clostridia.o__Caldicoprobacterales.f__Caldicoprobacteraceae		1.42916		-
p__Proteobacteria.c__Gammaproteobacteria.o__Pasteurellales.f__Pasteurellaceae.g__Haemophilus		0.474919		-
p__Proteobacteria.c__Alphaproteobacteria.o__Rhizobiales.f__Xanthobacteraceae.g__norank_f__Xanthobacteraceae		0.173889		-
p__Firmicutes.c__Clostridia.o__Lachnospirales.f__Lachnospiraceae.g__Lachnospiraceae_UCG-001		2.12328		-
p__Proteobacteria.c__Alphaproteobacteria.o__Rhizobiales.f__Rhizobiaceae		0.474919		-
p__Firmicutes.c__Clostridia.o__Lachnospirales.f__Lachnospiraceae.g__Lachnospiraceae_UCG-004		0.173889		-
p__Acidobacteriota.c__Acidobacteriae		0.599858		-
p__Firmicutes.c__Clostridia.o__Lachnospirales.f__Lachnospiraceae.g__Lachnospiraceae_UCG-006		3.53769		-
p__Nitrospirota		0.173889		-
p__Proteobacteria.c__Gammaproteobacteria.o__Enterobacterales.f__Morganellaceae.g__Proteus		1.17389		-
p__Actinobacteriota.c__Actinobacteria.o__Corynebacteriales.f__Mycobacteriaceae.g__Mycobacterium		0.65101		-
p__Verrucomicrobiota.c__Verrucomicrobiae.o__Verrucomicrobiales	SBF-H	5.05412	4.78848	0.0174446
p__Myxococcota.c__Polyangia.o__Polyangiales.f__Sandaracinaceae.g__norank_f__Sandaracinaceae		0.173889		-
p__Actinobacteriota.c__Actinobacteria.o__Corynebacteriales.f__Corynebacteriaceae	CUMS	3.37291	3.13467	0.00026845
p__Firmicutes.c__Clostridia.o__Oscillospirales.f__Ruminococcaceae.g__Eubacterium_siraeum_group	SBF-H	3.35287	3.11327	0.0412373
p__Actinobacteriota.c__Actinobacteria.o__Propionibacteriales		0.95204		-
p__Fusobacteriota.c__Fusobacteriia.o__Fusobacteriales.f__Leptotrichiaceae		0		-
p__Actinobacteriota		4.37795		-
p__Fusobacteriota.c__Fusobacteriia.o__Fusobacteriales		0.173889		-
p__Bacteroidota.c__Bacteroidia.o__Bacteroidales.f__Muribaculaceae	fluoxetin	5.56614	5.0036	0.029134
p__Nitrospirota.c__Nitrospiria		0.173889		-
p__Firmicutes.c__Clostridia.o__Peptostreptococcales-Tissierellales.f__Anaerovoracaceae.g__Family_XIII_UCG-001		1.70537		-
p__Bacteroidota.c__Bacteroidia.o__Bacteroidales.f__Tannerellaceae.g__unclassified_f__Tannerellaceae		0.474919		-
p__Firmicutes.c__Clostridia.o__Oscillospirales.f__Ruminococcaceae	control	4.17058	3.73691	0.00586439
p__Acidobacteriota.c__Acidobacteriae.o__Solibacterales.f__Solibacteraceae.g__Candidatus_Solibacter		0.599858		-
p__Firmicutes.c__Symbiobacteriia		0		-
p__Firmicutes.c__Bacilli.o__Bacillales.f__Bacillaceae.g__Bacillus		1.20192		-
p__Verrucomicrobiota	SBF-H	5.05412	4.78847	0.0174446
p__Firmicutes.c__Clostridia.o__Christensenellales.f__Christensenellaceae.g__norank_f__Christensenellaceae		2.96628		-
p__Actinobacteriota.c__Coriobacteriia.o__Coriobacteriales		4.3448		-
p__Firmicutes.c__Bacilli.o__Acholeplasmatales		1.99996		-
p__Bacteroidota.c__Bacteroidia.o__Chitinophagales.f__Chitinophagaceae		0.173889		-
p__Firmicutes.c__Clostridia.o__Lachnospirales.f__Lachnospiraceae.g__Eisenbergiella		1.70537		-
p__Actinobacteriota.c__Actinobacteria.o__Micromonosporales		0		-
p__Actinobacteriota.c__Coriobacteriia.o__Coriobacteriales.f__Eggerthellaceae.g__Gordonibacter		2.8515		0.00711728
p__Firmicutes.c__Clostridia.o__Lachnospirales.f__Lachnospiraceae.g__Tyzzerella		0.173889		-
p__Firmicutes.c__Negativicutes.o__Veillonellales-Selenomonadales.f__Veillonellaceae.g__Veillonella		0.474919		-
p__Firmicutes.c__Clostridia.o__Oscillospirales.f__Ruminococcaceae.g__Negativibacillus		2.67768		0.0145205
p__Firmicutes.c__Clostridia.o__Oscillospirales.f__Butyricicoccaceae.g__UCG-009		2.5577		-
p__Proteobacteria.c__Gammaproteobacteria.o__Burkholderiales.f__Alcaligenaceae		1.14393		-
p__Firmicutes.c__Clostridia.o__Oscillospirales.f__Ruminococcaceae.g__Subdoligranulum		0.173889		-
p__Bacteroidota.c__Bacteroidia.o__Bacteroidales.f__Prevotellaceae.g__unclassified_f__Prevotellaceae		3.45538		-
p__Firmicutes.c__Clostridia.o__Monoglobales		3.03303		-
p__Halanaerobiaeota.c__Halanaerobiia.o__Halanaerobiales		0		-
p__Firmicutes.c__Negativicutes.o__Veillonellales-Selenomonadales.f__Selenomonadaceae		0.599858		-
p__Firmicutes.c__Clostridia.o__Lachnospirales.f__unclassified_o__Lachnospirales.g__unclassified_o__Lachnospirales		0.173889		-
p__Firmicutes.c__Clostridia.o__Lachnospirales.f__Lachnospiraceae.g__Tuzzerella		2.69893		-
p__Chloroflexi.c__Anaerolineae.o__RBG-13-54-9.f__norank_o__RBG-13-54-9.g__norank_f__norank_o__RBG-13-54-9		0.474919		-
p__Firmicutes.c__Bacilli.o__Erysipelotrichales.f__Erysipelotrichaceae.g__Ileibacterium	SBF-H	4.81457	4.51334	0.00107887
p__Firmicutes.c__Negativicutes.o__Veillonellales-Selenomonadales.f__Veillonellaceae		0.474919		-
p__Firmicutes.c__Clostridia.o__Oscillospirales.f__Oscillospiraceae.g__UCG-007		2.12813		0.0341029
p__Firmicutes.c__Bacilli.o__Bacillales.f__Bacillaceae.g__unclassified_f__Bacillaceae		0		-
p__Firmicutes.c__Clostridia.o__Oscillospirales.f__Oscillospiraceae.g__UCG-005		2.56305		-
p__Firmicutes.c__Bacilli.o__Staphylococcales.f__Staphylococcaceae.g__Jeotgalicoccus		2.11341		0.0126703
p__Firmicutes.c__Negativicutes		0.775949		-
p__Actinobacteriota.c__Actinobacteria.o__Corynebacteriales.f__Corynebacteriaceae.g__Corynebacterium	CUMS	3.37291	3.13465	0.00026845
p__Proteobacteria.c__Gammaproteobacteria.o__Burkholderiales.f__Comamonadaceae.g__Comamonas		0.173889		-
p__unclassified_k__norank_d__Bacteria.c__unclassified_k__norank_d__Bacteria.o__unclassified_k__norank_d__Bacteria		2.79089		-
p__Proteobacteria.c__Alphaproteobacteria.o__Rhizobiales		0.65101		-
p__Firmicutes.c__Clostridia.o__Lachnospirales.f__Lachnospiraceae.g__Lachnospiraceae_NK4A136_group		4.6039		-
p__Proteobacteria.c__Gammaproteobacteria.o__Pseudomonadales.f__Moraxellaceae.g__Psychrobacter		1.67904		-
p__Firmicutes.c__Clostridia.o__Christensenellales.f__Christensenellaceae.g__unclassified_f__Christensenellaceae		0.65101		-
p__Firmicutes.c__Clostridia.o__Oscillospirales.f__norank_o__Oscillospirales		2.19919		-
p__Campilobacterota.c__Campylobacteria.o__Campylobacterales.f__Helicobacteraceae	control	4.06162	3.66792	0.00784436
p__Bacteroidota.c__Bacteroidia.o__Bacteroidales.f__Prevotellaceae.g__Prevotellaceae_NK3B31_group		3.34998		-
p__Bacteroidota.c__Bacteroidia.o__Flavobacteriales.f__Weeksellaceae.g__Empedobacter		0.474919		-
p__Actinobacteriota.c__Actinobacteria.o__Actinomycetales.f__Actinomycetaceae.g__Actinomyces		0.474919		-
p__Firmicutes.c__Clostridia.o__Oscillospirales.f__UCG-010		3.3799		-
p__unclassified_k__norank_d__Bacteria.c__unclassified_k__norank_d__Bacteria		2.79089		-
p__Firmicutes.c__Clostridia.o__Oscillospirales.f__Oscillospiraceae.g__Oscillibacter		3.18376		-
p__Actinobacteriota.c__Actinobacteria.o__Micrococcales.f__Microbacteriaceae.g__Leucobacter		1.07698		-
p__Chloroflexi.c__KD4-96		0.173889		-
p__Actinobacteriota.c__Actinobacteria.o__Bifidobacteriales.f__Bifidobacteriaceae		3.40765		-
p__Firmicutes.c__Clostridia.o__Oscillospirales.f__Clostridium_methylpentosum_group		1.17389		-
p__Chloroflexi.c__Chloroflexia		0.474919		-
p__Cyanobacteria.c__Vampirivibrionia.o__Gastranaerophilales.f__norank_o__Gastranaerophilales.g__norank_f__norank_o__Gastranaerophilales	fluoxetin	3.62151	3.23188	0.00179427
p__Firmicutes.c__Bacilli.o__Staphylococcales.f__Staphylococcaceae.g__Staphylococcus	control	3.26379	3.04294	0.000104127
p__Firmicutes.c__Bacilli.o__Lactobacillales.f__Carnobacteriaceae		1.96159		-
p__Actinobacteriota.c__Coriobacteriia.o__Coriobacteriales.f__Eggerthellaceae.g__norank_f__Eggerthellaceae		2.42916		-
p__Proteobacteria.c__Gammaproteobacteria.o__Enterobacterales.f__Morganellaceae.g__Morganella		0.474919		-
p__Proteobacteria.c__Alphaproteobacteria.o__Tistrellales.f__Geminicoccaceae.g__norank_f__Geminicoccaceae		0		-
p__Nitrospirota.c__Leptospirillia		0		-
p__Chloroflexi.c__Anaerolineae.o__unclassified_c__Anaerolineae		0		-
p__Firmicutes.c__Clostridia.o__Oscillospirales.f__unclassified_o__Oscillospirales		2.50227		0.0311855
p__Firmicutes.c__Bacilli.o__Bacillales		1.50295		-
p__Actinobacteriota.c__Actinobacteria.o__Corynebacteriales.f__Dietziaceae		1.25307		-
p__Firmicutes.c__Clostridia.o__norank_c__Clostridia.f__Hungateiclostridiaceae		2.17389		-
p__Halanaerobiaeota.c__Halanaerobiia		0		-
p__Actinobacteriota.c__Actinobacteria.o__Micrococcales.f__Micrococcaceae	CUMS	1.41277	3.63899	0.0167535
p__Firmicutes.c__Bacilli.o__Erysipelotrichales.f__Erysipelotrichaceae.g__unclassified_f__Erysipelotrichaceae		2.60686		-
p__Bacteroidota.c__Bacteroidia.o__Flavobacteriales.f__Flavobacteriaceae.g__norank_f__Flavobacteriaceae		2.01274		0.00555496
p__Bacteroidota.c__Bacteroidia.o__Flavobacteriales.f__NS9_marine_group.g__norank_f__NS9_marine_group		0		-
p__Firmicutes.c__Clostridia.o__Oscillospirales.f__Ruminococcaceae.g__Candidatus_Soleaferrea		2.66244		0.0455473
p__Proteobacteria.c__Gammaproteobacteria.o__Xanthomonadales		0		-
p__Firmicutes.c__Clostridia.o__Monoglobales.f__Monoglobaceae.g__Monoglobus		3.03303		-
p__Firmicutes.c__Bacilli.o__Erysipelotrichales.f__Erysipelotrichaceae.g__Clostridium_innocuum_group		3.02698		-
p__Campilobacterota	control	4.06162	3.66792	0.00784436
p__Firmicutes.c__norank_p__Firmicutes.o__norank_c__norank_p__Firmicutes.f__norank_o__norank_c__norank_p__Firmicutes.g__norank_f__norank_o__norank_c__norank_p__Firmicutes		1.67904		0.0421256
p__Bacteroidota.c__Bacteroidia.o__Bacteroidales.f__Marinifilaceae.g__Odoribacter		4.01291		-
p__Chloroflexi.c__AD3		1.12813		-
p__Bacteroidota.c__Bacteroidia.o__Flavobacteriales.f__Flavobacteriaceae.g__Capnocytophaga		0		-
p__Firmicutes.c__Clostridia.o__norank_c__Clostridia.f__norank_o__norank_c__Clostridia.g__norank_f__norank_o__norank_c__Clostridia		2.07152		-
p__Chloroflexi.c__KD4-96.o__norank_c__KD4-96.f__norank_o__norank_c__KD4-96		0.173889		-
p__Firmicutes.c__Bacilli.o__Lactobacillales.f__unclassified_o__Lactobacillales.g__unclassified_o__Lactobacillales		0.997798		-
p__Bacteroidota.c__Bacteroidia.o__unclassified_c__Bacteroidia.f__unclassified_c__Bacteroidia		1.07698		-
p__Firmicutes.c__Clostridia.o__Clostridia_vadinBB60_group		3.18206		-
p__Firmicutes.c__Clostridia.o__Oscillospirales.f__Ruminococcaceae.g__norank_f__Ruminococcaceae	control	3.78455	3.38918	0.0134305
p__Proteobacteria.c__Gammaproteobacteria.o__Enterobacterales.f__Enterobacteriaceae		1.66525		-
p__Proteobacteria.c__Gammaproteobacteria.o__Xanthomonadales.f__Xanthomonadaceae.g__Stenotrophomonas		0		-
p__Actinobacteriota.c__Actinobacteria.o__Propionibacteriales.f__Nocardioidaceae.g__Aeromicrobium		0.173889		-
p__Fusobacteriota.c__Fusobacteriia.o__Fusobacteriales.f__Fusobacteriaceae		0.173889		-
p__Proteobacteria.c__Gammaproteobacteria.o__Pseudomonadales.f__Moraxellaceae		2.42916		-
p__Firmicutes.c__Clostridia.o__Peptostreptococcales-Tissierellales.f__Peptostreptococcaceae.g__Paeniclostridium		0		-
p__Proteobacteria.c__Gammaproteobacteria.o__Burkholderiales.f__Comamonadaceae		1.21528		-
p__Deinococcota.c__Deinococci.o__Deinococcales.f__Trueperaceae.g__Truepera		0.474919		-
p__Firmicutes.c__Clostridia.o__Clostridia_vadinBB60_group.f__norank_o__Clostridia_vadinBB60_group.g__norank_f__norank_o__Clostridia_vadinBB60_group		3.18206		-
p__Firmicutes.c__Clostridia.o__unclassified_c__Clostridia.f__unclassified_c__Clostridia.g__unclassified_c__Clostridia		2.85784		0.022867
p__Myxococcota.c__Polyangia		0.474919		-
p__Actinobacteriota.c__Actinobacteria.o__Bifidobacteriales.f__Bifidobacteriaceae.g__Bifidobacterium		3.40765		-
p__Proteobacteria.c__Alphaproteobacteria.o__Rhizobiales.f__Hyphomicrobiaceae.g__Pedomicrobium		0.474919		-
p__Proteobacteria.c__Alphaproteobacteria.o__Rhodospirillales.f__norank_o__Rhodospirillales		2.98007		-
p__Actinobacteriota.c__Actinobacteria.o__Corynebacteriales	CUMS	3.38233	3.13635	0.00217081
p__Firmicutes.c__Clostridia.o__Peptostreptococcales-Tissierellales.f__Anaerovoracaceae.g__Eubacterium_nodatum_group		3.34853		-
p__Nitrospirota.c__Nitrospiria.o__Nitrospirales		0.173889		-
p__Verrucomicrobiota.c__Verrucomicrobiae.o__Verrucomicrobiales.f__Akkermansiaceae	SBF-H	5.05412	4.78848	0.0174446
p__Actinobacteriota.c__Actinobacteria.o__Micrococcales.f__Microbacteriaceae.g__Curtobacterium		0.474919		-
p__Proteobacteria.c__Alphaproteobacteria.o__Rhodobacterales.f__Rhodobacteraceae		1.12813		-
p__Verrucomicrobiota.c__Verrucomicrobiae.o__Verrucomicrobiales.f__Akkermansiaceae.g__Akkermansia	SBF-H	5.05412	4.78848	0.0174446
p__Firmicutes.c__Clostridia.o__Oscillospirales.f__Eubacterium_coprostanoligenes_group		3.53844		-
p__Firmicutes.c__unclassified_p__Firmicutes		2.87402		0.0044286
p__Firmicutes.c__Bacilli.o__Bacillales.f__Bacillaceae		1.25307		-
p__Firmicutes.c__Clostridia.o__Christensenellales	fluoxetin	3.6415	3.14742	0.0282929
p__Bacteroidota.c__Bacteroidia.o__Bacteroidales.f__Bacteroidaceae.g__Bacteroides	fluoxetin	4.4213	4.01047	0.0262991
p__Acidobacteriota.c__Vicinamibacteria.o__Vicinamibacterales.f__norank_o__Vicinamibacterales.g__norank_f__norank_o__Vicinamibacterales		0.173889		-
p__Firmicutes.c__Bacilli.o__Lactobacillales.f__Carnobacteriaceae.g__Atopostipes		1.77595		-
p__Campilobacterota.c__Campylobacteria.o__Campylobacterales	control	4.06162	3.66792	0.00784436
p__Actinobacteriota.c__Thermoleophilia.o__Solirubrobacterales		0.65101		-
p__Firmicutes.c__Clostridia.o__Oscillospirales.f__Butyricicoccaceae.g__unclassified_f__Butyricicoccaceae		1.51631		-
p__Chloroflexi.c__Anaerolineae.o__Anaerolineales		0.173889		-
p__Bacteroidota.c__Bacteroidia.o__Bacteroidales.f__Muribaculaceae.g__Muribaculum	fluoxetin	3.88027	3.53757	0.000249838
p__Nitrospirota.c__Leptospirillia.o__Leptospirillales		0		-
p__Proteobacteria.c__Gammaproteobacteria.o__Xanthomonadales.f__Xanthomonadaceae		0		-
p__Actinobacteriota.c__Actinobacteria.o__Micrococcales.f__Cellulomonadaceae		0.173889		-
p__Firmicutes.c__Bacilli.o__Erysipelotrichales.f__unclassified_o__Erysipelotrichales		0.775949		-
p__Bdellovibrionota		0.173889		-
p__Firmicutes.c__Clostridia.o__Lachnospirales.f__Lachnospiraceae.g__ASF356		2.13293		-
p__Firmicutes.c__Clostridia.o__Peptostreptococcales-Tissierellales.f__Anaerovoracaceae.g__Family_XIII_AD3011_group		2.67495		-
p__Nitrospirota.c__Leptospirillia.o__Leptospirillales.f__Leptospirillaceae		0		-
p__Actinobacteriota.c__Coriobacteriia.o__Coriobacteriales.f__Coriobacteriaceae		0.65101		-
p__Firmicutes.c__Clostridia.o__Lachnospirales.f__Lachnospiraceae.g__Lachnoclostridium		3.55627		-
p__Proteobacteria.c__Gammaproteobacteria.o__Immundisolibacterales		0		-
p__Gemmatimonadota.c__Gemmatimonadetes.o__Gemmatimonadales.f__Gemmatimonadaceae.g__norank_f__Gemmatimonadaceae		0.474919		-
p__Chloroflexi.c__Anaerolineae.o__Anaerolineales.f__Anaerolineaceae		0.173889		-
p__Halanaerobiaeota.c__Halanaerobiia.o__Halanaerobiales.f__Halanaerobiaceae		0		-
p__Proteobacteria.c__Gammaproteobacteria.o__Burkholderiales.f__Rhodocyclaceae		0		-
p__Actinobacteriota.c__Acidimicrobiia.o__Actinomarinales		0.173889		-
p__Proteobacteria.c__Gammaproteobacteria.o__Burkholderiales.f__Sutterellaceae.g__Parasutterella	fluoxetin	3.44666	3.11337	0.0121429
p__Firmicutes.c__Clostridia.o__Lachnospirales.f__Lachnospiraceae.g__A2		1.95204		-
p__Proteobacteria	fluoxetin	3.58752	3.20891	0.00312761
p__Cyanobacteria.c__Vampirivibrionia.o__Gastranaerophilales	fluoxetin	3.62151	3.23188	0.00179427
p__Firmicutes.c__Symbiobacteriia.o__Symbiobacteriales.f__Symbiobacteraceae.g__Symbiobacterium		0		-
p__Firmicutes.c__Bacilli.o__Erysipelotrichales.f__Erysipelotrichaceae.g__Turicibacter		3.48437		-
p__Firmicutes.c__Bacilli.o__Erysipelotrichales.f__Erysipelatoclostridiaceae.g__Erysipelatoclostridium		3.91896		-
p__Actinobacteriota.c__Actinobacteria.o__Propionibacteriales.f__Propionibacteriaceae		0.872859		-
p__Chloroflexi.c__AD3.o__norank_c__AD3.f__norank_o__norank_c__AD3		1.12813		-
p__Firmicutes.c__Bacilli.o__Erysipelotrichales.f__Erysipelatoclostridiaceae.g__norank_f__Erysipelatoclostridiaceae		2.0064		-
p__Chloroflexi.c__Anaerolineae.o__RBG-13-54-9.f__norank_o__RBG-13-54-9		0.474919		-
p__Actinobacteriota.c__Acidimicrobiia.o__Actinomarinales.f__norank_o__Actinomarinales		0.173889		-
p__Actinobacteriota.c__Actinobacteria.o__Micrococcales.f__Microbacteriaceae		1.07698		-
p__Chloroflexi	fluoxetin	1.32002	3.66079	0.0254484
p__Acidobacteriota.c__Blastocatellia.o__Blastocatellales		0		-
p__Proteobacteria.c__Gammaproteobacteria.o__Oceanospirillales.f__Halomonadaceae.g__Halomonas		0		-
p__Desulfobacterota	SBF-H	4.44319	3.96157	0.0237642
p__Proteobacteria.c__Gammaproteobacteria.o__Alteromonadales		0		-
p__Gemmatimonadota.c__Gemmatimonadetes.o__Gemmatimonadales		0.474919		-
p__Bacteroidota.c__Bacteroidia.o__Chitinophagales.f__Chitinophagaceae.g__UTBCD1		0		-
p__Chloroflexi.c__Chloroflexia.o__Chloroflexales.f__Roseiflexaceae		0.474919		-
p__Myxococcota.c__Polyangia.o__Polyangiales.f__Sandaracinaceae		0.173889		-
p__Proteobacteria.c__Gammaproteobacteria.o__Burkholderiales.f__Oxalobacteraceae.g__Oxalobacter		0.173889		-
p__Proteobacteria.c__Gammaproteobacteria.o__Cellvibrionales.f__Cellvibrionaceae.g__Cellvibrio		0		-
p__Deferribacterota.c__Deferribacteres	control	4.07795	3.72794	0.00117858
p__Firmicutes.c__norank_p__Firmicutes.o__norank_c__norank_p__Firmicutes		1.67904		0.0421256
p__Halanaerobiaeota		0		-
p__Bacteroidota.c__Bacteroidia.o__Bacteroidales.f__Tannerellaceae.g__Parabacteroides		3.79215		-
p__Firmicutes.c__Clostridia.o__Clostridiales.f__Clostridiaceae		3.5218		-
p__Firmicutes.c__Clostridia.o__Oscillospirales.f__Oscillospiraceae.g__Colidextribacter		3.89784		-
p__Firmicutes.c__Bacilli.o__Lactobacillales.f__Enterococcaceae.g__Enterococcus		1.42916		-
p__Actinobacteriota.c__Actinobacteria.o__Corynebacteriales.f__Nocardiaceae.g__Gordonia		0.173889		-
p__Actinobacteriota.c__MB-A2-108.o__norank_c__MB-A2-108.f__norank_o__norank_c__MB-A2-108		0		-
p__Actinobacteriota.c__Coriobacteriia.o__Coriobacteriales.f__Eggerthellaceae.g__Parvibacter	control	2.47708	3.07479	0.0474899
p__Firmicutes.c__Clostridia.o__Lachnospirales.f__Lachnospiraceae.g__Eubacterium_hallii_group		0.474919		-
p__Cyanobacteria.c__Cyanobacteriia.o__Chloroplast.f__norank_o__Chloroplast.g__norank_f__norank_o__Chloroplast		1.40434		-
p__Actinobacteriota.c__Coriobacteriia.o__Coriobacteriales.f__Coriobacteriaceae.g__Collinsella		0.65101		-
p__Myxococcota.c__Polyangia.o__Haliangiales		0.173889		-
p__Proteobacteria.c__Alphaproteobacteria.o__Rhodospirillales		2.98007		-
p__Verrucomicrobiota.c__Chlamydiae.o__Chlamydiales.f__Parachlamydiaceae.g__Neochlamydia		0.173889		-
p__Firmicutes.c__Clostridia.o__Oscillospirales.f__Oscillospiraceae.g__Intestinimonas		2.81338		0.0164872
p__Actinobacteriota.c__Actinobacteria.o__Micrococcales.f__Dermabacteraceae		1.07698		-
p__Proteobacteria.c__Alphaproteobacteria.o__Rhizobiales.f__Rhizobiales_Incertae_Sedis.g__Bauldia		0		-
p__Bacteroidota.c__Bacteroidia.o__Bacteroidales.f__Porphyromonadaceae		0.872859		-
p__Proteobacteria.c__Gammaproteobacteria.o__Cellvibrionales.f__Cellvibrionaceae		0		-
p__Firmicutes.c__Clostridia.o__Lachnospirales.f__unclassified_o__Lachnospirales		0.173889		-
p__Firmicutes.c__Bacilli.o__Erysipelotrichales.f__Erysipelotrichaceae		4.9157		-
p__Patescibacteria.c__Saccharimonadia.o__Saccharimonadales	control	4.29709	3.84544	0.00244317
p__Acidobacteriota.c__Vicinamibacteria.o__Vicinamibacterales.f__Vicinamibacteraceae		0		-
p__Firmicutes.c__Clostridia.o__Eubacteriales.f__Anaerofustaceae		1.85513		-
p__Proteobacteria.c__Gammaproteobacteria.o__Steroidobacterales		0		-
p__Firmicutes.c__Clostridia.o__Monoglobales.f__Monoglobaceae		3.03303		-
p__Bdellovibrionota.c__Bdellovibrionia		0.173889		-
p__Cyanobacteria	fluoxetin	3.62414	3.23553	0.00206609
p__Deferribacterota.c__Deferribacteres.o__Deferribacterales.f__Deferribacteraceae	control	4.07795	3.72794	0.00117858
p__Proteobacteria.c__Gammaproteobacteria.o__Cellvibrionales		0		-
p__Gemmatimonadota.c__Gemmatimonadetes.o__Gemmatimonadales.f__Gemmatimonadaceae		0.474919		-
p__Firmicutes.c__Clostridia.o__Caldicoprobacterales.f__Caldicoprobacteraceae.g__Caldicoprobacter		1.42916		-
p__Actinobacteriota.c__Coriobacteriia.o__Coriobacteriales.f__Coriobacteriales_Incertae_Sedis.g__norank_f__Coriobacteriales_Incertae_Sedis		1.12813		-
p__Firmicutes.c__Bacilli.o__Erysipelotrichales.f__Erysipelotrichaceae.g__Allobaculum	CUMS	3.64046	3.33967	0.00243966
p__Proteobacteria.c__Gammaproteobacteria	fluoxetin	3.4599	3.09524	0.00460763
p__Proteobacteria.c__Gammaproteobacteria.o__Xanthomonadales.f__Rhodanobacteraceae.g__Metallibacterium		0		-
p__Firmicutes.c__Clostridia.o__Lachnospirales.f__Lachnospiraceae.g__Lachnospiraceae_NK4B4_group		1.6924		-
p__Firmicutes.c__Clostridia.o__Oscillospirales.f__Clostridium_methylpentosum_group.g__norank_f__Clostridium_methylpentosum_group		1.17389		-
p__Firmicutes.c__Bacilli.o__Lactobacillales.f__unclassified_o__Lactobacillales		0.997798		-
p__Firmicutes.c__unclassified_p__Firmicutes.o__unclassified_p__Firmicutes.f__unclassified_p__Firmicutes		2.87402		0.0044286
p__Firmicutes.c__Clostridia.o__Oscillospirales.f__Ruminococcaceae.g__Faecalibacterium		0.298828		-
p__Bacteroidota.c__Bacteroidia.o__Bacteroidales.f__Prevotellaceae.g__Prevotella		0.474919		-
p__Proteobacteria.c__Gammaproteobacteria.o__Pseudomonadales		2.43396		-
p__Firmicutes.c__Bacilli.o__Lactobacillales.f__Aerococcaceae		2.36141		0.00543935
p__Actinobacteriota.c__Actinobacteria.o__Corynebacteriales.f__Mycobacteriaceae		0.65101		-
p__Actinobacteriota.c__Coriobacteriia.o__Coriobacteriales.f__Eggerthellaceae		4.2535		-
p__Firmicutes.c__Clostridia.o__Lachnospirales.f__Lachnospiraceae.g__Eubacterium_xylanophilum_group		3.77779		-
p__Firmicutes.c__Clostridia.o__Lachnospirales.f__Lachnospiraceae.g__Anaerostipes		2.23835		-
p__Firmicutes.c__Clostridia.o__Lachnospirales.f__Lachnospiraceae.g__Eubacterium_ventriosum_group		2.7992		-
p__Proteobacteria.c__Gammaproteobacteria.o__Alteromonadales.f__Marinobacteraceae		0		-
p__Firmicutes.c__Clostridia.o__Clostridia_vadinBB60_group.f__norank_o__Clostridia_vadinBB60_group		3.18206		-
p__Firmicutes.c__Clostridia.o__Oscillospirales.f__unclassified_o__Oscillospirales.g__unclassified_o__Oscillospirales		2.50227		0.0311855
p__Proteobacteria.c__Alphaproteobacteria.o__Rickettsiales		1.28783		-
p__Verrucomicrobiota.c__Chlamydiae		0.173889		-
p__Firmicutes.c__Clostridia.o__Oscillospirales.f__Ruminococcaceae.g__Ruminococcus		3.65819		-
p__Bacteroidota.c__Bacteroidia.o__Bacteroidales.f__Rikenellaceae.g__Alistipes	fluoxetin	4.0145	3.55491	0.0261964
p__Actinobacteriota.c__Actinobacteria.o__Propionibacteriales.f__Propionibacteriaceae.g__Luteococcus		0.872859		-
p__Proteobacteria.c__Gammaproteobacteria.o__Burkholderiales.f__Nitrosomonadaceae.g__mle1-7		0.474919		-
p__Bacteroidota.c__Bacteroidia.o__Chitinophagales.f__Chitinophagaceae.g__Lacibacter		0		-
p__Bacteroidota.c__Bacteroidia.o__Bacteroidales.f__Rikenellaceae.g__unclassified_f__Rikenellaceae		0		-
p__Cyanobacteria.c__Cyanobacteriia		1.40434		-
p__Bacteroidota.c__Bacteroidia.o__Bacteroidales.f__Rikenellaceae	control	4.14941	3.73164	0.0176434
p__Firmicutes.c__Clostridia.o__Peptostreptococcales-Tissierellales.f__Anaerovoracaceae.g__Eubacterium_brachy_group		3.00831		0.00995897
p__Proteobacteria.c__Gammaproteobacteria.o__Oceanospirillales		0		-
p__Firmicutes.c__Bacilli.o__unclassified_c__Bacilli.f__unclassified_c__Bacilli		2.24822		-
p__Verrucomicrobiota.c__Verrucomicrobiae	SBF-H	5.05412	4.78848	0.0174446
p__Actinobacteriota.c__MB-A2-108		0		-
p__Firmicutes.c__Bacilli.o__unclassified_c__Bacilli.f__unclassified_c__Bacilli.g__unclassified_c__Bacilli		2.24822		-
p__Actinobacteriota.c__MB-A2-108.o__norank_c__MB-A2-108		0		-
p__Firmicutes.c__Clostridia.o__Peptostreptococcales-Tissierellales.f__Peptostreptococcaceae.g__unclassified_f__Peptostreptococcaceae		0		-
p__Acidobacteriota.c__Blastocatellia.o__Blastocatellales.f__Blastocatellaceae		0		-
p__Myxococcota.c__Polyangia.o__Polyangiales		0.173889		-
p__Nitrospirota.c__Nitrospiria.o__Nitrospirales.f__Nitrospiraceae.g__Nitrospira		0.173889		-
p__Actinobacteriota.c__Actinobacteria.o__Corynebacteriales.f__norank_o__Corynebacteriales.g__norank_f__norank_o__Corynebacteriales		0.474919		-
p__Bacteroidota.c__Bacteroidia.o__Flavobacteriales	SBF-H	2.02515	3.0187	0.00555496
p__Proteobacteria.c__Alphaproteobacteria.o__Rhodobacterales		1.12813		-
p__Proteobacteria.c__Gammaproteobacteria.o__Immundisolibacterales.f__Immundisolibacteraceae		0		-
p__Chloroflexi.c__Anaerolineae.o__RBG-13-54-9		0.474919		-
p__Actinobacteriota.c__Actinobacteria.o__Bifidobacteriales		3.40765		-
p__Proteobacteria.c__Alphaproteobacteria.o__Rickettsiales.f__Mitochondria.g__norank_f__Mitochondria		1.28783		-
p__unclassified_k__norank_d__Bacteria.c__unclassified_k__norank_d__Bacteria.o__unclassified_k__norank_d__Bacteria.f__unclassified_k__norank_d__Bacteria.g__unclassified_k__norank_d__Bacteria		2.79089		-
p__Actinobacteriota.c__Acidimicrobiia.o__Actinomarinales.f__norank_o__Actinomarinales.g__norank_f__norank_o__Actinomarinales		0.173889		-
p__Actinobacteriota.c__Actinobacteria.o__Micromonosporales.f__Micromonosporaceae		0		-
p__Bacteroidota.c__Bacteroidia.o__Bacteroidales.f__Rikenellaceae.g__Rikenella	control	3.53825	3.22808	0.027825
p__Firmicutes.c__Bacilli.o__Lactobacillales.f__Carnobacteriaceae.g__Jeotgalibaca		1.69677		-
p__Firmicutes.c__Bacilli.o__Lactobacillales.f__Lactobacillaceae	CUMS	5.70736	5.14034	0.0103679
p__Actinobacteriota.c__Actinobacteria.o__Corynebacteriales.f__Nocardiaceae.g__Smaragdicoccus		0.173889		-
p__Firmicutes.c__Clostridia.o__Clostridia_UCG-014		4.45161		-
p__Firmicutes.c__Clostridia.o__Peptococcales.f__Peptococcaceae.g__norank_f__Peptococcaceae		3.14609		-
p__Actinobacteriota.c__Coriobacteriia.o__Coriobacteriales.f__Eggerthellaceae.g__Adlercreutzia	SBF-H	3.85314	3.49759	0.00368956
p__Actinobacteriota.c__Thermoleophilia		0.65101		-
p__Firmicutes.c__Clostridia.o__Peptococcales.f__Peptococcaceae		3.14978		-
p__Firmicutes.c__Bacilli.o__Erysipelotrichales.f__unclassified_o__Erysipelotrichales.g__unclassified_o__Erysipelotrichales		0.775949		-
p__Firmicutes.c__norank_p__Firmicutes.o__norank_c__norank_p__Firmicutes.f__norank_o__norank_c__norank_p__Firmicutes		1.67904		0.0421256
p__Proteobacteria.c__Gammaproteobacteria.o__Burkholderiales.f__Comamonadaceae.g__Aquabacterium		0		-
p__Proteobacteria.c__Alphaproteobacteria		2.99343		-
p__Firmicutes.c__Clostridia.o__Peptostreptococcales-Tissierellales.f__unclassified_o__Peptostreptococcales-Tissierellales.g__unclassified_o__Peptostreptococcales-Tissierellales		0.173889		-
p__Firmicutes.c__Negativicutes.o__Veillonellales-Selenomonadales.f__Selenomonadaceae.g__Anaerovibrio		0.599858		-
p__Proteobacteria.c__Gammaproteobacteria.o__Xanthomonadales.f__Xanthomonadaceae.g__Lysobacter		0		-
p__Cyanobacteria.c__Vampirivibrionia.o__Gastranaerophilales.f__norank_o__Gastranaerophilales	fluoxetin	3.62151	3.23188	0.00179427
p__Firmicutes.c__Clostridia.o__Lachnospirales.f__Lachnospiraceae.g__Eubacterium_oxidoreducens_group		1.6924		-
p__Firmicutes.c__Clostridia.o__Christensenellales.f__Christensenellaceae.g__Christensenellaceae_R-7_group	fluoxetin	3.58652	3.07432	0.0171125
p__Firmicutes.c__Bacilli.o__Lactobacillales.f__Lactobacillaceae.g__Lactobacillus	CUMS	5.70736	5.14033	0.0103679
p__Proteobacteria.c__Gammaproteobacteria.o__Burkholderiales.f__Nitrosomonadaceae		0.474919		-
p__Proteobacteria.c__Gammaproteobacteria.o__Oceanospirillales.f__Halomonadaceae		0		-
p__Firmicutes.c__Clostridia.o__norank_c__Clostridia.f__norank_o__norank_c__Clostridia		2.07152		-
p__Firmicutes.c__Clostridia.o__Clostridia_UCG-014.f__norank_o__Clostridia_UCG-014.g__norank_f__norank_o__Clostridia_UCG-014		4.45161		-
p__Bacteroidota.c__Bacteroidia.o__Chitinophagales.f__Chitinophagaceae.g__Terrimonas		0		-
p__Firmicutes.c__Clostridia.o__Peptostreptococcales-Tissierellales.f__Anaerovoracaceae.g__unclassified_f__Anaerovoracaceae	SBF-H	2.15616	3.02331	0.000502871
p__Firmicutes.c__Bacilli.o__RF39		3.87312		-
p__Bacteroidota.c__Bacteroidia.o__Bacteroidales.f__Porphyromonadaceae.g__Porphyromonas		0.872859		-
p__Proteobacteria.c__Alphaproteobacteria.o__Rhizobiales.f__Hyphomicrobiaceae		0.474919		-
p__Actinobacteriota.c__Coriobacteriia		4.3448		-
p__Firmicutes.c__Bacilli.o__Staphylococcales	control	3.29347	3.07986	6.91041e-05
p__Firmicutes.c__Clostridia.o__Lachnospirales.f__Defluviitaleaceae.g__Defluviitaleaceae_UCG-011		2.26379		-
p__Firmicutes.c__Bacilli.o__unclassified_c__Bacilli		2.24822		-
p__Proteobacteria.c__Alphaproteobacteria.o__Rhodobacterales.f__Rhodobacteraceae.g__Paracoccus		1.07698		-
p__Campilobacterota.c__Campylobacteria	control	4.06162	3.66792	0.00784436
p__Actinobacteriota.c__Actinobacteria.o__Micrococcales.f__Micrococcaceae.g__Rothia		0.298828		-
p__Verrucomicrobiota.c__Lentisphaeria.o__Victivallales.f__Victivallaceae		0.474919		-
p__Firmicutes.c__Bacilli.o__Lactobacillales.f__Streptococcaceae		2.73974		-
p__Bacteroidota.c__Bacteroidia.o__Bacteroidales.f__Bacteroidaceae	fluoxetin	4.4213	4.01047	0.0262991
p__Firmicutes.c__Clostridia.o__Peptostreptococcales-Tissierellales.f__Anaerovoracaceae		3.70396		-
p__Myxococcota.c__Myxococcia.o__Myxococcales		0.474919		-
p__Verrucomicrobiota.c__Chlamydiae.o__Chlamydiales		0.173889		-
p__Firmicutes.c__Clostridia.o__Oscillospirales.f__Butyricicoccaceae		2.62873		-
p__Bdellovibrionota.c__Bdellovibrionia.o__Bdellovibrionales.f__Bdellovibrionaceae.g__Bdellovibrio		0.173889		-
p__unclassified_k__norank_d__Bacteria.c__unclassified_k__norank_d__Bacteria.o__unclassified_k__norank_d__Bacteria.f__unclassified_k__norank_d__Bacteria		2.79089		-
p__Firmicutes.c__Clostridia.o__Oscillospirales.f__norank_o__Oscillospirales.g__Hydrogenoanaerobacterium		0.65101		-
p__Planctomycetota		0		-
p__Acidobacteriota		0.599858		-
p__Firmicutes.c__Clostridia.o__Lachnospirales.f__Lachnospiraceae.g__Ruminococcus_torques_group		2.66244		-
p__Planctomycetota.c__Planctomycetes		0		-
p__Firmicutes.c__Bacilli.o__Lactobacillales.f__Aerococcaceae.g__Aerococcus		2.36141		0.00374035
p__Acidobacteriota.c__Acidobacteriae.o__Solibacterales		0.599858		-
p__Halanaerobiaeota.c__Halanaerobiia.o__Halanaerobiales.f__Halanaerobiaceae.g__Halanaerobium		0		-
p__Firmicutes.c__Clostridia.o__Lachnospirales.f__Lachnospiraceae.g__norank_f__Lachnospiraceae	SBF-H	4.48188	4.05944	0.0327743
p__Firmicutes.c__Bacilli.o__RF39.f__norank_o__RF39		3.87312		-
p__Firmicutes.c__Bacilli.o__Lactobacillales.f__Lactobacillaceae.g__unclassified_f__Lactobacillaceae		0.298828		-
p__Fibrobacterota.c__Fibrobacteria		0		-
p__Myxococcota.c__Myxococcia		0.474919		-
p__Proteobacteria.c__Gammaproteobacteria.o__Burkholderiales.f__Sutterellaceae	fluoxetin	3.44666	3.11337	0.0121429
p__Firmicutes.c__unclassified_p__Firmicutes.o__unclassified_p__Firmicutes.f__unclassified_p__Firmicutes.g__unclassified_p__Firmicutes		2.87402		0.0044286
p__Firmicutes.c__Bacilli.o__Erysipelotrichales.f__Erysipelotrichaceae.g__Solobacterium		0.298828		-
p__Actinobacteriota.c__Actinobacteria.o__Propionibacteriales.f__Nocardioidaceae.g__Nocardioides		0.173889		-
p__Actinobacteriota.c__Coriobacteriia.o__Coriobacteriales.f__Eggerthellaceae.g__unclassified_f__Eggerthellaceae		2.55591		-
p__Proteobacteria.c__Alphaproteobacteria.o__Rhizobiales.f__Rhizobiaceae.g__Pseudaminobacter		0		-
p__Proteobacteria.c__Alphaproteobacteria.o__Sphingomonadales.f__Sphingomonadaceae.g__Sphingomonas		0.173889		-
p__Firmicutes.c__Clostridia.o__Peptostreptococcales-Tissierellales.f__Anaerovoracaceae.g__Anaerovorax		3.16111		-
p__Bacteroidota.c__Bacteroidia.o__Bacteroidales.f__unclassified_o__Bacteroidales.g__unclassified_o__Bacteroidales		2.57356		-
p__Actinobacteriota.c__Actinobacteria.o__Actinomycetales.f__Actinomycetaceae		0.474919		-
p__Firmicutes.c__Clostridia.o__Oscillospirales.f__Oscillospiraceae.g__NK4A214_group		3.16644		-
p__Bacteroidota.c__Bacteroidia.o__Flavobacteriales.f__Weeksellaceae.g__Elizabethkingia		0		-
p__Actinobacteriota.c__unclassified_p__Actinobacteriota.o__unclassified_p__Actinobacteriota		0		-
p__Proteobacteria.c__Gammaproteobacteria.o__Burkholderiales.f__Neisseriaceae		1.12813		-
p__Actinobacteriota.c__Coriobacteriia.o__Coriobacteriales.f__unclassified_o__Coriobacteriales		1.65101		-
p__Acidobacteriota.c__Vicinamibacteria.o__Vicinamibacterales.f__Vicinamibacteraceae.g__Luteitalea		0		-
p__Firmicutes.c__Bacilli.o__Erysipelotrichales.f__Erysipelatoclostridiaceae		3.9465		-
p__Firmicutes.c__Bacilli.o__Lactobacillales	CUMS	5.70778	5.14035	0.0103679
p__Campilobacterota.c__Campylobacteria.o__Campylobacterales.f__Helicobacteraceae.g__Helicobacter	control	4.06162	3.66792	0.00784436
p__Firmicutes.c__Bacilli.o__Lactobacillales.f__Aerococcaceae.g__Facklamia		1.69677		-
p__Firmicutes.c__Bacilli.o__Mycoplasmatales.f__Mycoplasmataceae		0.775949		-
p__Proteobacteria.c__Gammaproteobacteria.o__Pseudomonadales.f__Pseudomonadaceae.g__Pseudomonas		0.474919		-
p__Chloroflexi.c__AD3.o__norank_c__AD3		1.12813		-
p__Verrucomicrobiota.c__Chlamydiae.o__Chlamydiales.f__Parachlamydiaceae		0.173889		-
p__Firmicutes.c__Symbiobacteriia.o__Symbiobacteriales.f__Symbiobacteraceae		0		-
p__Proteobacteria.c__Gammaproteobacteria.o__Pasteurellales.f__Pasteurellaceae		0.474919		-
p__Actinobacteriota.c__Coriobacteriia.o__Coriobacteriales.f__unclassified_o__Coriobacteriales.g__unclassified_o__Coriobacteriales		1.65101		-
p__Verrucomicrobiota.c__Lentisphaeria		0.474919		-
p__Acidobacteriota.c__Vicinamibacteria.o__Vicinamibacterales		0.173889		-
p__Actinobacteriota.c__Actinobacteria.o__Micrococcales.f__Micrococcaceae.g__Enteractinococcus		1.25307		-
p__Firmicutes.c__Clostridia.o__Oscillospirales.f__Butyricicoccaceae.g__Butyricicoccus		1.84599		-
p__Nitrospirota.c__Leptospirillia.o__Leptospirillales.f__Leptospirillaceae.g__Leptospirillum		0		-
p__Chloroflexi.c__KD4-96.o__norank_c__KD4-96.f__norank_o__norank_c__KD4-96.g__norank_f__norank_o__norank_c__KD4-96		0.173889		-
p__Chloroflexi.c__Anaerolineae.o__unclassified_c__Anaerolineae.f__unclassified_c__Anaerolineae		0		-
p__Firmicutes.c__Clostridia.o__Peptococcales.f__Peptococcaceae.g__Peptococcus		1.12813		-
p__Fusobacteriota		0.173889		-
p__Chloroflexi.c__Chloroflexia.o__Chloroflexales		0.474919		-
p__Proteobacteria.c__Gammaproteobacteria.o__Burkholderiales.f__Rhodocyclaceae.g__Dechloromonas		0		-
p__Bacteroidota	fluoxetin	5.63581	5.07941	0.0181548
p__Cyanobacteria.c__Cyanobacteriia.o__Chloroplast		1.40434		-
p__Firmicutes.c__Bacilli.o__Acholeplasmatales.f__Acholeplasmataceae		1.99996		-
p__Firmicutes.c__Clostridia.o__Lachnospirales.f__Lachnospiraceae.g__Blautia		3.05356		-
p__Firmicutes.c__Clostridia.o__norank_c__Clostridia		2.42674		-
p__Actinobacteriota.c__Actinobacteria.o__Micrococcales.f__Micrococcaceae.g__Glutamicibacter		0.872859		-
p__Fibrobacterota.c__Fibrobacteria.o__Fibrobacterales.f__norank_o__Fibrobacterales.g__BBMC-4		0		-
p__Acidobacteriota.c__Blastocatellia.o__Blastocatellales.f__Blastocatellaceae.g__norank_f__Blastocatellaceae		0		-
p__Firmicutes.c__Clostridia.o__Oscillospirales.f__Ruminococcaceae.g__Harryflintia		2.70152		0.00560354
p__Actinobacteriota.c__Coriobacteriia.o__Coriobacteriales.f__Atopobiaceae	SBF-H	3.61825	3.30002	0.00351842
p__Proteobacteria.c__Gammaproteobacteria.o__Burkholderiales	fluoxetin	3.45104	3.1136	0.00963034
p__Cyanobacteria.c__Cyanobacteriia.o__Chloroplast.f__norank_o__Chloroplast		1.40434		-
p__Desulfobacterota.c__Desulfovibrionia.o__Desulfovibrionales.f__Desulfovibrionaceae.g__norank_f__Desulfovibrionaceae	SBF-H	4.30845	3.95954	0.0104688
p__Firmicutes.c__Clostridia.o__Lachnospirales.f__Lachnospiraceae	SBF-H	5.11465	4.59981	0.0118017
p__Firmicutes.c__Clostridia.o__unclassified_c__Clostridia		2.85784		0.022867
p__Firmicutes.c__Clostridia.o__Clostridiales.f__Clostridiaceae.g__Candidatus_Arthromitus		2.61005		-
p__Bacteroidota.c__Bacteroidia.o__Chitinophagales.f__Chitinophagaceae.g__norank_f__Chitinophagaceae		0.173889		-
p__Firmicutes.c__Clostridia.o__Oscillospirales.f__Oscillospiraceae.g__norank_f__Oscillospiraceae		3.8663		-
p__Patescibacteria.c__Saccharimonadia.o__Saccharimonadales.f__norank_o__Saccharimonadales		0.474919		-
p__Firmicutes.c__Clostridia.o__Lachnospirales.f__Lachnospiraceae.g__GCA-900066575		2.9403		0.0429801
p__Bdellovibrionota.c__Bdellovibrionia.o__Bdellovibrionales.f__Bdellovibrionaceae		0.173889		-
p__Actinobacteriota.c__Coriobacteriia.o__Coriobacteriales.f__Eggerthellaceae.g__Enterorhabdus		3.96907		-
p__Actinobacteriota.c__Actinobacteria.o__Micrococcales.f__Brevibacteriaceae		0		-
p__Patescibacteria.c__Saccharimonadia.o__Saccharimonadales.f__Saccharimonadaceae.g__TM7x		0.298828		-
p__Firmicutes.c__Bacilli.o__Lactobacillales.f__Enterococcaceae		1.42916		-
p__Chloroflexi.c__AD3.o__norank_c__AD3.f__norank_o__norank_c__AD3.g__norank_f__norank_o__norank_c__AD3		1.12813		-
p__Bacteroidota.c__Bacteroidia.o__unclassified_c__Bacteroidia.f__unclassified_c__Bacteroidia.g__unclassified_c__Bacteroidia		1.07698		-
p__Proteobacteria.c__Alphaproteobacteria.o__Sphingomonadales.f__Sphingomonadaceae		0.173889		-
p__Firmicutes.c__Clostridia.o__Clostridiales		3.5218		-
p__Planctomycetota.c__Planctomycetes.o__Isosphaerales.f__Isosphaeraceae.g__unclassified_f__Isosphaeraceae		0		-
p__Bacteroidota.c__Bacteroidia.o__Bacteroidales.f__Marinifilaceae.g__Butyricimonas		0.173889		-
p__Bacteroidota.c__Bacteroidia.o__Bacteroidales.f__Marinifilaceae		4.01291		-
p__Firmicutes.c__Bacilli.o__Mycoplasmatales		0.775949		-
p__Bacteroidota.c__Bacteroidia.o__Chitinophagales.f__Chitinophagaceae.g__Ferruginibacter		0		-
p__Bacteroidota.c__Bacteroidia.o__Bacteroidales.f__Tannerellaceae		3.79236		-
p__Firmicutes.c__Clostridia.o__Lachnospirales.f__Lachnospiraceae.g__Lachnospiraceae_UCG-010		0.474919		-
p__Planctomycetota.c__Planctomycetes.o__Isosphaerales		0		-
p__Fusobacteriota.c__Fusobacteriia		0.173889		-
p__Chloroflexi.c__Anaerolineae.o__Anaerolineales.f__Anaerolineaceae.g__norank_f__Anaerolineaceae		0.173889		-
p__Firmicutes.c__Bacilli.o__Erysipelotrichales		4.95452		-
p__Firmicutes.c__Clostridia.o__Clostridiales.f__Clostridiaceae.g__Clostridium_sensu_stricto_1		3.5171		-
p__Deinococcota		0.474919		-
p__Firmicutes.c__Clostridia.o__Peptostreptococcales-Tissierellales.f__unclassified_o__Peptostreptococcales-Tissierellales		0.173889		-
p__Proteobacteria.c__Alphaproteobacteria.o__Rhizobiales.f__Rhizobiales_Incertae_Sedis		0		-
p__Firmicutes.c__Bacilli.o__RF39.f__norank_o__RF39.g__norank_f__norank_o__RF39		3.87312		-
p__Deferribacterota.c__Deferribacteres.o__Deferribacterales	control	4.07795	3.72794	0.00117858
p__Firmicutes.c__Clostridia.o__Clostridiales.f__Clostridiaceae.g__unclassified_f__Clostridiaceae		0		-
p__Proteobacteria.c__Alphaproteobacteria.o__Rickettsiales.f__Mitochondria		1.28783		-
p__Fibrobacterota		0		-
p__Acidobacteriota.c__Vicinamibacteria.o__Vicinamibacterales.f__norank_o__Vicinamibacterales		0.173889		-
p__Actinobacteriota.c__Actinobacteria.o__Corynebacteriales.f__Dietziaceae.g__Dietzia		1.25307		-
p__Proteobacteria.c__Alphaproteobacteria.o__Tistrellales		0		-
p__Firmicutes.c__Bacilli.o__Erysipelotrichales.f__Erysipelatoclostridiaceae.g__Candidatus_Stoquefichus		3.24687		-
p__Actinobacteriota.c__Actinobacteria.o__Corynebacteriales.f__Nocardiaceae	fluoxetin	1.66525	3.2765	0.0186865
p__Firmicutes.c__Bacilli.o__Bacillales.f__Bacillaceae.g__Pseudogracilibacillus		0.298828		-
p__Firmicutes.c__Clostridia.o__Lachnospirales.f__Lachnospiraceae.g__Marvinbryantia		2.7314		-
p__Firmicutes.c__Clostridia.o__Oscillospirales.f__Ruminococcaceae.g__Fournierella		0.173889		-
p__Actinobacteriota.c__unclassified_p__Actinobacteriota		0		-
p__Deinococcota.c__Deinococci		0.474919		-
p__Firmicutes.c__Clostridia.o__Oscillospirales.f__Ruminococcaceae.g__Anaerotruncus		2.57356		0.00660404
p__Firmicutes.c__Clostridia.o__Oscillospirales.f__Ruminococcaceae.g__Pygmaiobacter	SBF-H	2.53372	3.40375	0.0141201
p__Firmicutes.c__Clostridia.o__Christensenellales.f__Christensenellaceae.g__Christensenella		1.79714		-
p__Firmicutes.c__Clostridia.o__Oscillospirales.f__Oscillospiraceae		4.24152		-
p__Bacteroidota.c__Bacteroidia.o__Bacteroidales.f__unclassified_o__Bacteroidales		2.57356		-
p__Firmicutes.c__Clostridia.o__Lachnospirales.f__Lachnospiraceae.g__Eubacterium_fissicatena_group		4.15444		-
p__Proteobacteria.c__Alphaproteobacteria.o__Tistrellales.f__Geminicoccaceae		0		-
p__Actinobacteriota.c__Actinobacteria.o__Micromonosporales.f__Micromonosporaceae.g__Salinispora		0		-
p__Firmicutes.c__Bacilli.o__Mycoplasmatales.f__Mycoplasmataceae.g__Mycoplasma		0.775949		-
p__Proteobacteria.c__Alphaproteobacteria.o__Rhizobiales.f__Xanthobacteraceae		0.173889		-
p__Bacteroidota.c__Bacteroidia.o__Bacteroidales.f__Rikenellaceae.g__Rikenellaceae_RC9_gut_group		2.8632		-
p__Proteobacteria.c__Gammaproteobacteria.o__Burkholderiales.f__Neisseriaceae.g__Neisseria		1.12813		-
p__Actinobacteriota.c__unclassified_p__Actinobacteriota.o__unclassified_p__Actinobacteriota.f__unclassified_p__Actinobacteriota.g__unclassified_p__Actinobacteriota		0		-
p__Firmicutes.c__Bacilli.o__Erysipelotrichales.f__Erysipelotrichaceae.g__norank_f__Erysipelotrichaceae	control	3.51254	3.09319	0.0103397
p__Patescibacteria.c__Saccharimonadia	control	4.29709	3.84544	0.00244317
p__Firmicutes.c__Clostridia.o__Oscillospirales.f__norank_o__Oscillospirales.g__norank_f__norank_o__Oscillospirales		2.19092		-
p__Planctomycetota.c__Planctomycetes.o__Isosphaerales.f__Isosphaeraceae		0		-
p__Firmicutes.c__Clostridia.o__Peptostreptococcales-Tissierellales.f__Peptostreptococcaceae		3.62352		-
p__Actinobacteriota.c__Coriobacteriia.o__Coriobacteriales.f__Atopobiaceae.g__Coriobacteriaceae_UCG-002	SBF-H	3.61825	3.30002	0.00351842
p__Proteobacteria.c__Gammaproteobacteria.o__Burkholderiales.f__Comamonadaceae.g__Alicycliphilus		1.12813		-
p__Firmicutes.c__Bacilli.o__Lactobacillales.f__Streptococcaceae.g__Streptococcus		2.50633		-
p__Actinobacteriota.c__Actinobacteria.o__Corynebacteriales.f__Nocardiaceae.g__Rhodococcus	fluoxetin	1.65101	3.30298	0.00904531
p__Proteobacteria.c__Gammaproteobacteria.o__Enterobacterales.f__Enterobacteriaceae.g__Escherichia-Shigella		1.66525		-
p__Desulfobacterota.c__Desulfovibrionia.o__Desulfovibrionales	SBF-H	4.44319	3.96157	0.0237642
p__Actinobacteriota.c__unclassified_p__Actinobacteriota.o__unclassified_p__Actinobacteriota.f__unclassified_p__Actinobacteriota		0		-
p__Actinobacteriota.c__Thermoleophilia.o__Solirubrobacterales.f__67-14		0.65101		-
p__Nitrospirota.c__Nitrospiria.o__Nitrospirales.f__Nitrospiraceae		0.173889		-
p__Patescibacteria.c__Saccharimonadia.o__Saccharimonadales.f__norank_o__Saccharimonadales.g__norank_f__norank_o__Saccharimonadales		0.474919		-
p__Firmicutes.c__Clostridia.o__Christensenellales.f__Christensenellaceae	fluoxetin	3.6415	3.14742	0.0282929
p__Firmicutes		5.8153		-
p__Verrucomicrobiota.c__Lentisphaeria.o__Victivallales		0.474919		-
p__Proteobacteria.c__Alphaproteobacteria.o__Rhizobiales.f__Rhizobiaceae.g__Ochrobactrum		0.474919		-
p__Proteobacteria.c__Gammaproteobacteria.o__Steroidobacterales.f__Steroidobacteraceae		0		-
p__Actinobacteriota.c__Actinobacteria.o__Micrococcales.f__Dermabacteraceae.g__Brachybacterium		1.07698		-
p__Actinobacteriota.c__Actinobacteria.o__Actinomycetales		0.474919		-
p__Firmicutes.c__Bacilli.o__Erysipelotrichales.f__Erysipelotrichaceae.g__Faecalibaculum		3.14563		-
p__Firmicutes.c__Bacilli.o__Acholeplasmatales.f__Acholeplasmataceae.g__Anaeroplasma		1.99996		-
p__Firmicutes.c__Bacilli.o__Lactobacillales.f__Streptococcaceae.g__Lactococcus	control	2.35858	3.2349	0.00819017
p__Proteobacteria.c__Gammaproteobacteria.o__Steroidobacterales.f__Steroidobacteraceae.g__norank_f__Steroidobacteraceae		0		-
p__Gemmatimonadota.c__Gemmatimonadetes		0.474919		-
p__Proteobacteria.c__Gammaproteobacteria.o__Xanthomonadales.f__Rhodanobacteraceae		0		-
p__Acidobacteriota.c__Acidobacteriae.o__Solibacterales.f__Solibacteraceae		0.599858		-
p__Firmicutes.c__Clostridia.o__Oscillospirales.f__Ruminococcaceae.g__Paludicola		2.13293		0.042597
p__Firmicutes.c__Clostridia.o__Lachnospirales	SBF-H	5.11478	4.59958	0.0118017
p__Myxococcota.c__Polyangia.o__Haliangiales.f__Haliangiaceae		0.173889		-
p__Firmicutes.c__Clostridia.o__Oscillospirales.f__Ruminococcaceae.g__UBA1819		2.52024		0.0145326
p__Chloroflexi.c__Chloroflexia.o__Chloroflexales.f__Roseiflexaceae.g__norank_f__Roseiflexaceae		0.474919		-
p__Patescibacteria	control	4.29709	3.84544	0.00244317
p__Desulfobacterota.c__Desulfovibrionia.o__Desulfovibrionales.f__Desulfovibrionaceae	SBF-H	4.44319	3.96157	0.0237642
p__Actinobacteriota.c__Actinobacteria.o__Corynebacteriales.f__norank_o__Corynebacteriales		0.474919		-
p__Myxococcota.c__Myxococcia.o__Myxococcales.f__Anaeromyxobacteraceae.g__Anaeromyxobacter		0.474919		-
p__Firmicutes.c__Bacilli.o__Bacillales.f__Planococcaceae.g__Sporosarcina		1.14393		-
p__Fusobacteriota.c__Fusobacteriia.o__Fusobacteriales.f__Fusobacteriaceae.g__Fusobacterium		0.173889		-
p__Firmicutes.c__Clostridia.o__Oscillospirales.f__Oscillospiraceae.g__unclassified_f__Oscillospiraceae		2.64518		0.0140663
p__Myxococcota		0.775949		-
p__Desulfobacterota.c__Desulfovibrionia.o__Desulfovibrionales.f__Desulfovibrionaceae.g__Bilophila		1.67904		-
p__Bacteroidota.c__Bacteroidia.o__Bacteroidales.f__Muribaculaceae.g__norank_f__Muribaculaceae	control	5.56201	4.99329	0.0228838
p__Proteobacteria.c__Gammaproteobacteria.o__Pasteurellales		0.474919		-
p__Bacteroidota.c__Bacteroidia.o__Bacteroidales	fluoxetin	5.63575	5.07933	0.0181548
p__Proteobacteria.c__Gammaproteobacteria.o__Burkholderiales.f__Oxalobacteraceae		0.173889		-
p__Firmicutes.c__Bacilli	CUMS	5.76042	5.12749	0.0173974
p__Bacteroidota.c__Bacteroidia.o__Flavobacteriales.f__Weeksellaceae		0.474919		-
p__Firmicutes.c__Clostridia.o__Oscillospirales.f__UCG-010.g__norank_f__UCG-010		3.3799		-
p__Proteobacteria.c__Gammaproteobacteria.o__Immundisolibacterales.f__Immundisolibacteraceae.g__Immundisolibacter		0		-
p__Proteobacteria.c__Alphaproteobacteria.o__Sphingomonadales		0.173889		-

## Sheet: Fig.6 Heatmap
	Cortex_IL1β	Cortex_IL6	Cortex_TNFα	Hippo_IL1β	Hippo_IL6	Hippo_TNFα	SI_IL1β	SI_IL6	SI_TNFα	SI_LPS	Serum_IL1β	Serum_IL6	Serum_TNFα	Serum_LPS	Cortex_5HT	Hippo_5HT	Cortex_NE	Hippo_NE	Cortex_DA	Hippo_DA	Cortex_NGF	Hippo_NGF	Cortex_BDNF	Hippo_BDNF	Cortex_GDNF	Hippo_GDNF	Serum_ACTH	Serum_Cortisol	Serum_CRF
f__Lactobacillaceae	0.33043	0.44609	-0.05826	0.68	0.37565	0.17739	0.32174	0.32174	0.27652	0.6513	0.16351	0.54435	0.40609	0.49652	-0.47652	-0.23652	-0.33478	-0.41739	-0.2913	-0.26174	-0.43652	0.14957	-0.42435	-0.37652	-0.39043	-0.43043	0.34087	0.32783	0.3
f__Muribaculaceae	-0.26957	-0.27913	-0.05043	-0.34	-0.20348	-0.21304	-0.30174	-0.30174	-0.26	-0.46522	-0.4988	-0.31739	-0.39391	-0.4713	0.34087	0.49652	0.40435	0.59043	0.32	0.52261	0.50696	-0.09565	0.37304	0.24087	0.45391	0.43826	-0.60522	-0.44	-0.48087
f__Akkermansiaceae	0.24348	0.41826	0.18174	0.03565	0.05391	0.40087	0.45826	0.45826	0.55217	0.31478	0.14786	-0.01217	0.50696	0.51913	-0.26783	-0.38783	-0.36348	-0.15652	-0.34522	-0.5087	-0.2287	-0.05826	-0.38435	-0.25826	-0.36	-0.46522	0.33304	0.40087	0.37652
f__Lachnospiraceae	-0.26962	-0.29702	0.10089	-0.4701	-0.25788	-0.14655	-0.45575	-0.45575	-0.44618	-0.43444	0.15007	-0.31616	-0.60144	-0.35747	0.26614	0.11916	0.13177	0.19917	0.15395	0.19048	0.08002	-0.01348	0.34399	0.40444	0.15917	0.41444	-0.08785	-0.12959	-0.00696
f__Erysipelotrichaceae	0.4313	0.21478	0.09826	0.28957	0.23913	0.35739	0.58087	0.58087	0.48957	0.33739	0.02653	0.22957	0.54174	0.40435	-0.25565	-0.20261	-0.29217	-0.20696	-0.37478	-0.40174	-0.21478	0.21043	-0.15739	-0.1113	-0.30261	-0.36435	0.28	0.39391	0.33217
f__norank_o__Clostridia_UCG-014	-0.33826	-0.27217	0.17913	-0.29565	0.09043	-0.40522	-0.24783	-0.24783	-0.17826	-0.26783	0.07871	0.00261	-0.60522	-0.28522	0.20348	-0.00696	0.22261	-0.02783	0.07652	0.05913	0.09913	-0.05391	0.27652	0.1913	0.1513	0.32783	-0.11304	-0.11739	-0.00435
f__Desulfovibrionaceae	-0.21739	-0.26609	-0.15478	-0.3313	-0.37391	-0.20087	-0.47913	-0.47913	-0.45043	-0.41913	0.23092	-0.25217	-0.35913	-0.33739	0.27652	0.09652	0.1113	0.12522	0.25652	0.17478	0.08174	-0.0113	0.3887	0.2	0.25304	0.24522	0.00957	-0.15304	-0.07652
f__Oscillospiraceae	-0.51391	-0.14348	0.18522	-0.41826	-0.1513	-0.34522	-0.34435	-0.34435	-0.16609	-0.41826	0.15656	-0.25652	-0.48609	-0.22174	0.08696	-0.17217	0.11565	0.02696	0.14522	0.00435	0.08	-0.45826	0.07739	-0.11739	0.12522	0.14087	0.00261	-0.09217	-0.06522
f__Bacteroidaceae	-0.18265	-0.44401	-0.29659	-0.51794	-0.36225	-0.15873	-0.44531	-0.44531	-0.21265	-0.36965	-0.17094	-0.40313	-0.21526	-0.46314	0.51576	0.18961	0.34051	0.34312	0.29746	0.27876	0.48445	-0.01044	0.41618	0.4214	0.40661	0.42314	-0.23527	-0.38226	-0.24049
f__Prevotellaceae	-0.19652	-0.26696	-0.47304	-0.37304	-0.34522	-0.29739	-0.62522	-0.62522	-0.28957	-0.40957	-0.29572	-0.25913	-0.27304	-0.47391	0.49043	0.38	0.41043	0.47478	0.47478	0.45304	0.50174	0.00435	0.46957	0.4313	0.5	0.54087	-0.44261	-0.58435	-0.43565
f__Eggerthellaceae	-0.03652	-0.37043	-0.00783	-0.44783	-0.25304	-0.14348	-0.08522	-0.08522	-0.04696	-0.32783	0.08089	-0.3513	0.1687	-0.28087	0.35304	0.06174	0.1913	0.06522	0.14522	0.01739	0.18348	0.01652	0.19217	0.31913	0.16696	0.35739	-0.15478	-0.24957	-0.23826
f__Saccharimonadaceae	-0.37478	-0.42522	-0.22261	-0.1513	-0.24696	-0.52957	-0.33565	-0.33565	-0.59217	-0.57565	-0.10959	-0.0487	-0.5287	-0.60261	0.34957	0.41304	0.5087	0.12609	0.50261	0.52957	0.26261	0.19913	0.56261	0.33043	0.4913	0.4313	-0.3313	-0.49913	-0.52
f__Marinifilaceae	-0.23304	-0.11043	-0.1313	-0.05739	-0.00957	-0.34261	-0.34696	-0.34696	-0.19304	-0.14	0.28919	0.14087	-0.4913	-0.18696	0.22261	-0.13565	0.14435	-0.07739	0.19478	0.0313	0	-0.1087	0.1087	0.01565	0.08087	0.13304	-0.06261	-0.16522	-0.06696
f__Ruminococcaceae	-0.38087	-0.29826	-0.1487	-0.47652	-0.35304	-0.36348	-0.49478	-0.49478	-0.60261	-0.54609	0.0387	-0.27913	-0.73565	-0.59217	0.24783	0.25043	0.27043	0.09217	0.41652	0.38609	0.17739	0.05304	0.4513	0.35478	0.4487	0.41043	-0.16696	-0.39304	-0.40783
f__Rikenellaceae	-0.42174	-0.48522	-0.31043	-0.38348	-0.32	-0.45043	-0.44174	-0.44174	-0.52522	-0.57478	-0.19135	-0.25478	-0.6	-0.73304	0.51478	0.3713	0.46261	0.23652	0.45391	0.54087	0.3887	0.00435	0.40348	0.36696	0.49478	0.50174	-0.50087	-0.62	-0.60957
f__Helicobacteraceae	-0.30957	-0.20435	-0.03652	-0.15304	-0.02696	-0.09826	-0.21565	-0.21565	-0.62348	-0.44783	0.22701	0.05913	-0.73652	-0.41043	0.04174	0.03391	0.00522	-0.07913	0.32957	0.22783	0.00174	-0.04	0.34	0.21565	0.29043	0.19217	0.0713	-0.16087	-0.17391
f__Erysipelatoclostridiaceae	0.0913	-0.1113	-0.18957	-0.42957	-0.27739	-0.07913	-0.40261	-0.40261	0.14696	-0.17739	-0.1496	-0.40957	0.10609	-0.2087	0.25478	0.03652	0.10696	0.27043	0.08087	-0.01565	0.2087	-0.20348	0.11043	0.24435	0.07565	0.24522	-0.15826	-0.18174	-0.10522
f__Deferribacteraceae	-0.46846	-0.43541	-0.08395	-0.20574	-0.01609	-0.26968	-0.18965	-0.18965	-0.59983	-0.602	0.09702	-0.00783	-0.76686	-0.49326	0.32318	0.21183	0.32318	0.06264	0.32231	0.36233	0.09743	0.07699	0.34276	0.33362	0.25837	0.34754	-0.12832	-0.3458	-0.28621
f__norank_o__RF39	-0.18308	-0.27702	-0.22614	-0.25701	-0.29789	-0.30485	-0.60839	-0.60839	-0.38748	-0.37834	-0.18747	-0.1496	-0.24571	-0.42792	0.43966	0.38835	0.40183	0.31485	0.41705	0.47793	0.34051	0.08263	0.49489	0.48445	0.37486	0.62405	-0.394	-0.43401	-0.26788
f__Anaerovoracaceae	-0.24696	-0.33565	-0.0887	-0.60435	-0.44261	-0.30261	-0.58522	-0.58522	-0.26348	-0.56696	-0.0661	-0.57217	-0.39913	-0.48783	0.27217	0.11304	0.20783	0.23913	0.14783	0.17739	0.27478	-0.23043	0.34	0.32435	0.24609	0.38	-0.14348	-0.26348	-0.18957
f__Tannerellaceae	-0.16696	-0.30522	-0.24957	-0.40696	-0.29913	-0.18609	-0.40348	-0.40348	0.03217	-0.28087	-0.11916	-0.40522	-0.08174	-0.33304	0.3713	-0.00435	0.22522	0.24609	0.09217	0.08	0.23043	-0.27652	0.08348	0.13217	0.08435	0.17652	-0.1313	-0.22087	-0.10609
f__Christensenellaceae	-0.13699	-0.30485	-0.29398	-0.4875	-0.45271	-0.35269	-0.65971	-0.65971	-0.18221	-0.42966	-0.24837	-0.54229	-0.19222	-0.4314	0.3279	0.23483	0.33659	0.39095	0.20744	0.23266	0.35442	-0.0835	0.39922	0.36225	0.25571	0.37617	-0.2157	-0.33225	-0.23831
f__Eubacterium_coprostanoligenes_group	-0.11094	0.08701	0.15923	-0.34109	-0.40026	-0.23581	-0.22058	-0.22058	0.11181	-0.07744	0.00109	-0.29106	0.03219	-0.00827	-0.01958	-0.14009	0.05482	0.04481	0.05612	-0.07048	0.268	-0.13008	0.20057	-0.06265	0.23276	0.04003	-0.04003	0.00131	0.00392
f__Bifidobacteriaceae	0.13876	0.1244	0.12788	-0.03871	-0.01435	0.32275	0.33362	0.33362	0.194	0.06786	-0.23668	-0.10439	0.35015	0.09308	0.06568	0.16572	-0.06438	0.03349	0	0.01392	-0.02827	0.01696	-0.22184	0.04872	-0.05394	-0.05916	-0.20835	-0.0013	-0.06394
f__Atopobiaceae	0.35217	0.19478	0.25739	-0.06522	0.01043	0.23826	0.28522	0.28522	0.46609	0.07043	0.24788	-0.12957	0.50609	0.27565	-0.22435	-0.43043	-0.32174	-0.15478	-0.41478	-0.5313	-0.13739	-0.22696	-0.15043	-0.29217	-0.31826	-0.41652	0.42	0.47826	0.41043
f__norank_o__Gastranaerophilales	0.34007	0.38748	-0.04218	0.18526	-0.05784	-0.01	-0.18308	-0.18308	0.57621	0.30137	-0.15681	0.05784	0.39922	0.37399	-0.22788	-0.09828	-0.16873	0.12046	-0.32311	-0.19874	0.02174	-0.22048	-0.18308	-0.31137	-0.17873	-0.14612	-0.03653	0.17656	0.27484
f__Sutterellaceae	0.1231	-0.01261	-0.18269	-0.3284	-0.40061	-0.06916	-0.26925	-0.26925	0.34276	-0.09482	-0.37764	-0.37625	0.26403	0.03132	0.22488	0.19835	0.25098	0.4254	0.11048	0.04524	0.38365	0.02958	0.24054	0.17877	0.21618	0.16442	-0.24358	-0.16268	-0.0983
f__UCG-010	-0.3284	-0.15789	-0.1057	-0.2388	0.06438	-0.33884	-0.21227	-0.21227	-0.00348	-0.20574	0.17968	0.01261	-0.40583	-0.12397	0.05046	-0.21618	0.09265	-0.06351	-0.04828	-0.15007	-0.10744	-0.14659	0.05655	-0.14267	-0.05002	-0.03001	0.26011	0.00304	0.05655
f__Clostridiaceae	-0.05221	0.04481	0.22536	-0.18664	0.16663	0.02523	0.42549	0.42549	0.37764	0.18229	0.15709	0.25799	0.08919	0.19796	-0.02741	-0.2332	-0.09223	-0.26931	-0.07005	-0.31586	-0.20709	0.07483	-0.17055	-0.12269	-0.01479	-0.07092	0.1675	0.10224	0.12356
f__Peptostreptococcaceae	-0.08783	-0.12632	-0.04301	0.11953	0.31965	-0.0489	0.54648	0.54648	0.13719	0.21461	-0.23639	0.23317	0.07606	-0.16073	-0.00407	0.09553	0.08602	-0.12722	-0.11953	0.0652	-0.16345	0.27437	-0.15213	-0.03486	-0.05297	-0.05886	-0.08919	-0.05705	-0.18291
f__Peptococcaceae	-0.32238	-0.15227	0.0422	-0.27931	-0.07135	-0.26713	-0.51599	-0.51599	-0.28627	-0.31281	-0.0705	-0.14096	-0.36111	-0.1849	0.30063	0.11312	0.20579	0.18925	0.34022	0.13792	0.2506	-0.26365	0.2667	0.12356	0.23668	0.3089	-0.22884	-0.20318	-0.11225
f__norank_o__Clostridia_vadinBB60_group	-0.23184	-0.2114	-0.23054	-0.2823	-0.1679	-0.47412	-0.46542	-0.46542	-0.24141	-0.40887	0.16206	-0.05307	-0.63419	-0.37538	0.13006	0.02827	0.18182	-0.0361	0.19835	0.1318	0.11527	-0.13876	0.21879	0.01044	0.29013	0.20661	-0.06481	-0.32927	-0.3097
f__Monoglobaceae	0.03043	0.11391	-0.32174	0.14348	0.05391	-0.11043	-0.4713	-0.4713	-0.36087	-0.01565	0.06567	0.20174	-0.12783	-0.07739	0.02174	0.21565	0.06609	0.16957	0.28609	0.30609	0.12783	0.04087	0.17913	0.08609	0.23217	0.31652	-0.09478	-0.2913	-0.2087
f__Corynebacteriaceae	0.27336	0.40849	0.39165	0.32387	0.56799	0.32741	0.46874	0.46874	0.2645	0.35222	0.56124	0.36861	0.08861	0.3252	-0.55381	-0.70489	-0.68141	-0.70179	-0.65172	-0.66014	-0.60299	-0.36241	-0.55824	-0.60476	-0.63444	-0.72217	0.73546	0.7297	0.64818
f__Staphylococcaceae	-0.3729	-0.5049	-0.22435	0.00392	0.11152	-0.32542	0.00044	0.00044	-0.55021	-0.32847	0.2024	0.01133	-0.42518	-0.54193	0.22958	0.07972	0.132	-0.26922	0.1002	0.19691	-0.2139	0.09453	0.00915	0.25964	-0.0183	0.1821	-0.03572	-0.30974	-0.24788
f__unclassified_k__norank_d__Bacteria	0.10002	0.18526	0.18439	0.13786	0.13351	0.18265	-0.08045	-0.08045	0.03349	0.02348	-0.02131	-0.05088	-0.09872	0.12611	-0.3292	-0.03088	-0.27397	0.16047	-0.28658	-0.05088	-0.18178	-0.38052	-0.26093	-0.35442	-0.25179	-0.21744	0.10611	0.2631	0.19569
f__unclassified_p__Firmicutes	-0.29604	0.09317	0.23857	0.31824	0.5764	-0.11276	0.31606	0.31606	0.05616	0.25076	0.41977	0.43448	-0.20766	0.22682	-0.34697	-0.40618	-0.3017	-0.47236	-0.30387	-0.34219	-0.64606	-0.22551	-0.52024	-0.47148	-0.4741	-0.27819	0.35046	0.2869	0.25816
f__unclassified_c__Clostridia	-0.45116	-0.32499	0.1749	-0.47901	-0.12356	-0.469	-0.42114	-0.42114	-0.43115	-0.47857	0.14077	-0.22232	-0.6948	-0.41462	0.31151	0.08223	0.29149	0.05525	0.24146	0.15053	0.13487	-0.08092	0.35284	0.25973	0.24016	0.38547	-0.15706	-0.22406	-0.14053
f__Streptococcaceae	0.14581	0.32209	-0.36344	-0.15669	-0.20501	0.0222	-0.08749	-0.08749	0.07095	0.10316	0.02394	0.08966	-0.07748	-0.0988	0.09619	0.09314	-0.04222	-0.02133	0.16192	0.08531	-0.02786	0.23199	0.0222	0.06442	0.19978	0.0148	-0.12361	-0.20849	-0.23678
f__norank_o__Rhodospirillales	0.25348	0.12021	0.00174	0	0.14373	0.30488	0.03049	0.03049	0.48345	0.0993	-0.17861	-0.05836	0.10889	0.14895	-0.18206	-0.26829	-0.29617	-0.027	-0.3676	-0.2953	0.0662	-0.4068	-0.17073	-0.16028	-0.19077	-0.2561	0.19774	0.29617	0.3615
f__unclassified_o__Bacteroidales	-0.5135	-0.41768	-0.08232	-0.40462	-0.11716	-0.29965	-0.36019	-0.36019	-0.39504	-0.36585	0.05032	-0.36629	-0.55488	-0.47735	0.29312	0.07883	0.17378	0.19207	0.11498	0.20775	0.03833	-0.21341	0.10017	0.14068	0.10845	0.28049	-0.13981	-0.23693	-0.16159
f__Butyricicoccaceae	-0.29294	-0.16739	0.23017	-0.34176	0.11857	-0.10985	-0.05929	-0.05929	-0.06364	-0.29032	0.16438	-0.31822	-0.42895	-0.19878	-0.11247	-0.22232	-0.22755	-0.19704	-0.25283	-0.25458	-0.2694	-0.4429	-0.19704	-0.13514	-0.22581	-0.08718	0.17698	0.1578	0.08544
f__unclassified_o__Oscillospirales	-0.37701	-0.27253	-0.24467	-0.34219	-0.1663	-0.45364	-0.51676	-0.51676	-0.40618	-0.42795	-0.19813	-0.22595	-0.48411	-0.569	0.34393	0.30866	0.35829	0.27296	0.3448	0.40226	0.23509	-0.09186	0.32172	0.27993	0.33217	0.45581	-0.36047	-0.46757	-0.41271
f__Aerococcaceae	-0.19927	-0.147	0.21401	-0.11751	0.17336	-0.13359	0.18095	0.18095	-0.34895	-0.24708	0.26992	-0.02815	-0.38246	-0.35431	-0.02636	-0.0764	-0.15191	-0.29042	-0.16174	-0.05496	-0.31142	-0.04513	-0.0554	0.01966	-0.13895	-0.05406	0.09249	0.06523	0.00581
f__Hungateiclostridiaceae	-0.21956	-0.09758	0.0697	-0.09976	0.132	-0.35286	-0.26051	-0.26051	-0.05489	-0.13766	0.42985	0.03006	-0.3472	-0.01307	-0.12024	-0.42344	-0.06099	-0.33936	-0.17774	-0.32498	-0.17164	-0.31714	-0.03834	-0.32063	-0.16728	-0.22	0.48965	0.20213	0.28055
f__Moraxellaceae	0.29254	0.24944	0.35123	-0.01651	-0.01742	0.21367	0.09537	0.09537	0.17057	-0.24669	-0.08989	0.00825	-0.04769	-0.00642	-0.16507	-0.06052	-0.22376	-0.04585	-0.38057	-0.11371	-0.02568	-0.20175	0.04952	-0.12839	-0.19533	-0.22009	0.07795	0.36774	0.2907
f__norank_o__norank_c__Clostridia	-0.40578	-0.37036	-0.37736	-0.15829	-0.27635	-0.54002	-0.15042	-0.15042	-0.1819	-0.20989	-0.09403	-0.36511	-0.03192	-0.38566	0.2007	0.09838	0.24487	-0.02274	0.06865	0.09357	-0.04548	0.13861	0.11325	0.17141	0.03629	0.11762	-0.13992	-0.3039	-0.30171
f__norank_o__Oscillospirales	-0.19424	-0.12935	-0.22249	-0.32447	-0.34257	-0.23971	-0.56771	-0.56771	-0.25781	-0.45867	-0.12187	0.00574	-0.52003	-0.3589	0.32491	0.24766	0.28871	0.30814	0.43263	0.40172	0.38186	-0.06092	0.48737	0.24103	0.50547	0.46132	-0.31299	-0.39599	-0.30107
f__unclassified_c__Bacilli	0.15548	0.18622	0.10233	0.34345	0.29602	0.09531	0.26835	0.26835	0.2297	0.30919	-0.31541	0.24024	0.33423	0.29207	-0.30041	0.14274	-0.10058	-0.09399	0.02591	-0.06281	-0.16602	0.06193	-0.16075	-0.08301	-0.0852	-0.05797	-0.09267	0.07291	-0.05666
f__Acholeplasmataceae	0.31996	-0.14294	-0.25712	-0.09382	-0.46335	0.15002	-0.27217	-0.27217	-0.23189	-0.18675	0.09583	0.04735	-0.02877	-0.19428	0.24296	0.30801	0.06771	0.17215	0.33147	0.3859	0.35404	0.30137	0.46113	0.40228	0.53637	0.45936	-0.26022	-0.32173	-0.24119
