# Supplementary material for: Flavonoids from Seabuckthorn (Hippophae rhamnoides L.) restore CUMS-induced depressive disorder and regulate the gut microbiota in mice
Source: Royal Society of Chemistry journal article supplement (doi:10.1039/d3fo01332d), 2023-01-01
Supplement: d3fo01332d4.pdf [file d3fo01332d4.pdf]

1 **Supplementary figure S1. HPLC-DAD analysis of flavonoid fraction from Seabuckthorn (SBF).**

2 **(A)** HPLC equipped with a DAD detector at 300 nm was set to determine the content of SBF.  
3 Isorhamnetin, quercetin and kaempferol were applied as standards. The peaks of 1, 2 and 3 were  
4 identified as isorhamnetin, quercetin and kaempferol, respectively. **(B)** The structures of isorhamnetin,  
5 quercetin and kaempferol and the corresponding percentages of weight in SBF.

6
