# Supplementary figures and images for: Flavonoids from Seabuckthorn (Hippophae rhamnoides L.) restore CUMS-induced depressive disorder and regulate the gut microbiota in mice
Source: Royal Society of Chemistry journal article supplement (doi:10.1039/d3fo01332d), 2023-01-01

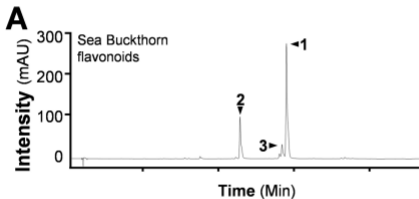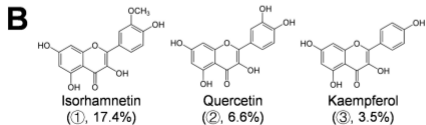

Supplement: d3fo01332d3.pdf [file d3fo01332d3.pdf]
